1 **Metabolic fingerprinting reveals roles of *Arabidopsis thaliana* BGLU1, BGLU3**  
2 **and BGLU4 in glycosylation of various flavonoids**

3

4 Jana-Freja Frommann<sup>1</sup>, Boas Pucker<sup>1</sup>, Lennart Malte Sielmann<sup>1</sup>, Caroline Müller<sup>2</sup>,  
5 Bernd Weisshaar<sup>1</sup>, Ralf Stracke<sup>1,\*</sup>, Rabea Schweiger<sup>2,\*</sup>

6

7 <sup>1</sup> Department of Genetics and Genomics of Plants, Faculty of Biology, Bielefeld  
8 University, Sequenz 1, 33615 Bielefeld, Germany

9 <sup>2</sup> Department of Chemical Ecology, Faculty of Biology, Bielefeld University,  
10 Universitätsstr. 25, 33615 Bielefeld, Germany

11

12 \*Correspondence: [rabea.schweiger@uni-bielefeld.de](mailto:rabea.schweiger@uni-bielefeld.de), [ralf.stracke@uni-bielefeld.de](mailto:ralf.stracke@uni-bielefeld.de)

13

14 Number of Tables: 0

15 Number of Figures: 7

16 Number of Supplementary Tables: 5

17 Number of Supplementary Figures: 3

18 Word count: 5,112 (start of Introduction to end of Acknowledgements, excluding

19 Materials and methods)

20

21 Running title: *Arabidopsis* BGLU flavonoid glycosyltransferases

22

23 **Highlight**

24 The proteins BGLU1, BGLU3 and BGLU4 are involved in glycosylations of different,  
25 already glycosylated flavonoids in *Arabidopsis thaliana*. BGLU3 appears to be  
26 multifunctional, acting on several complex substrates.

27

28 **Abstract**

29 Flavonoids are specialized metabolites that play important roles in plants, including  
30 interactions with the environment. The high structural diversity of this metabolite  
31 group is largely due to enzyme-mediated modifications of flavonoid core skeletons. In  
32 particular, glycosylation with different sugars is very common. In this study, the  
33 functions of the *Arabidopsis thaliana* glycoside hydrolase family 1-type  
34 glycosyltransferase proteins BGLU1, BGLU3 and BGLU4 were investigated, using a  
35 reverse genetics approach and untargeted metabolic fingerprinting. We screened for  
36 metabolic differences between *A. thaliana* wild type, loss-of-function mutants and  
37 overexpression lines and partially identified differentially accumulating metabolites,  
38 which are putative products and/or substrates of the BGLU enzymes. Our study  
39 revealed that the investigated BGLU proteins are glycosyltransferases involved in the  
40 glycosylation of already glycosylated flavonoids using different substrates. While  
41 BGLU1 appears to be involved in the rhamnosylation of a kaempferol diglycoside in  
42 leaves, BGLU3 and BGLU4 are likely involved in the glycosylation of quercetin  
43 glycosides in *A. thaliana* seeds. In addition, we present evidence that BGLU3 is a  
44 multifunctional enzyme that catalyzes other metabolic reactions with more complex  
45 substrates. This study deepens our understanding of the metabolic pathways and  
46 enzymes that contribute to the high structural diversity of flavonoids.

47

48

49 **Keywords**

50 Arabidopsis, BGLU, flavonoid, glycosylation, (acyl-glucose-dependent)

51 glycosyltransferase, metabolic fingerprinting

52

53 **Abbreviations**

54 2x35S, double enhancer cauliflower mosaic virus 35S; AGT, acyl-glucose-dependent

55 glycosyltransferase; BGLU,  $\beta$ -glucosidase; CDS, coding sequence; CE, collision

56 energy; Col-0, Columbia-0; ESI, electrospray ionization; FC, fold change; GH1,

57 glycoside hydrolase family 1; GT, glycosyltransferase; Hex, hexosyl; MS/MS

58 spectrum, fragment spectrum;  $m/z$ , mass-to-charge ratio; NL, neutral loss; RT-qPCR,

59 reverse transcriptase quantitative real-time PCR; rH, relative humidity; Rha,

60 rhamnosyl; RT, retention time; RT-PCR, reverse transcriptase semi-quantitative

61 PCR; T-DNA, transfer DNA; TT13, TRANSPARENT TESTA13; UGT, UDP-

62 glycosyltransferase; wt, wild type

## 63 **Introduction**

64 Plant specialized metabolites are of great importance for plant functioning (Kessler  
65 and Kalske, 2018). One of the best studied groups of these metabolites are  
66 flavonoids (Tohge *et al.*, 2013; Wen *et al.*, 2020). Flavonoids are characterized by a  
67 C6-C3-C6 core skeleton, with two aromatic rings (A and B) that are linked with a  
68 three-carbon bridge (C ring). They include various subclasses such as flavonols,  
69 anthocyanidins and flavanols which have distinct substitution patterns. Among the  
70 multiple functions that flavonoids fulfill in plants is the protection against diverse  
71 abiotic and biotic stresses, especially due to their antioxidative activities. They also  
72 attract beneficial organisms such as pollinators and seed dispersers via the  
73 generation or modification of flower and fruit colors (Falcone Ferreyra *et al.*, 2012; Le  
74 Roy *et al.*, 2016; Mierziak *et al.*, 2014). The plethora of flavonoid functions is thought  
75 to be linked to their high structural diversity, with more than 8,000 known compounds  
76 and probably many more that have not yet been described (Tohge *et al.*, 2013; Wen  
77 *et al.*, 2020). While the core flavonoid biosynthetic pathway is well understood,  
78 knowledge about flavonoid-modifying enzymes is limited and incomplete (Tohge *et*  
79 *al.*, 2013; Wen *et al.*, 2020).

80 Specific enzymes modify the flavonoid skeleton (Le Roy *et al.*, 2016; Tanaka *et al.*,  
81 2008), with glycosylation being one of the most abundant modifications. Sugar  
82 moieties, commonly glucose, galactose, rhamnose, xylose, arabinose and/or  
83 glucuronic acid, are bound to the skeleton by O- or C-glycosidic linkages (Kachlicki *et*  
84 *al.*, 2016; Noguchi *et al.*, 2009). Because sugar residues enhance the water  
85 solubility, protect reactive nucleophilic groups and increase metabolite stability  
86 (Gachon *et al.*, 2005; Plaza *et al.*, 2014), glycosylation is important for metabolite  
87 transport and storage (Le Roy *et al.*, 2016; Wang *et al.*, 2019). Oligo-/polymerization  
88 and condensation reactions further increase the structural diversity of flavonoids.

89 These condensates include oligo-/polymers of flavanols like proanthocyanidins or  
90 condensed tannins (Dixon *et al.*, 2005), condensates of anthocyanins with flavanols  
91 (Gonzalez-Manzano *et al.*, 2008; Lee *et al.*, 2009; Remy *et al.*, 2000) and  
92 pyranoanthocyanins that are formed by reactions of anthocyanins with small non-  
93 flavonoid molecules and/or other flavonoids to form a new pyrane ring (Andersen *et*  
94 *al.*, 2004; Fulcrand *et al.*, 1998; Nave *et al.*, 2010; Rentzsch *et al.*, 2007).

95 Glycosylation is catalyzed by glycosyltransferases (GTs), most of them utilizing an  
96 uridine diphosphate (UDP)-activated sugar as donor, which leads to the designation  
97 UDP-GTs or UGTs (Le Roy *et al.*, 2016). Moreover, acyl-glucose-dependent GTs  
98 (AGTs) glycosylate already substituted flavonoids at the skeleton or substituents.  
99 Such sugar transfers to anthocyanin acceptors have been described for different  
100 plant species, including *Arabidopsis thaliana* (Brassicaceae) (Matsuba *et al.*, 2010;  
101 Miyahara *et al.*, 2013; Miyahara *et al.*, 2012). Evidence for transfer of acyl-derived  
102 sugars to flavonol glucoside acceptors has, to our knowledge, so far only been  
103 provided for *A. thaliana* (Ishihara *et al.*, 2016). The AGTs exhibit high amino acid  
104 sequence similarity to glycoside hydrolase family 1 (GH1) proteins that typically act  
105 as  $\beta$ -glucosidases (BGLUs) (Matsuba *et al.*, 2010; Miyahara *et al.*, 2012).  
106 Phylogenetic analysis of 47 BGLUs of *A. thaliana* revealed a cluster of BGLU1 to  
107 BGLU11 (Miyahara *et al.*, 2011; Xu *et al.*, 2004), including the potential AGTs BGLU6  
108 (Ishihara *et al.*, 2016) and BGLU10 (Miyahara *et al.*, 2013). Since phylogenetic  
109 clustering might suggest similar protein functions, BGLU1 to BGLU11 may all act as  
110 AGTs (Miyahara *et al.*, 2011), while the separation of BGLU1 to BGLU6 within this  
111 cluster points to an activity on non-anthocyanin flavonoid substrates, as genetically  
112 demonstrated for BGLU6 (Ishihara *et al.*, 2016).

113 In the present study, we investigated the functions of the *A. thaliana* *BGLU* genes  
114 *BGLU1*, *BGLU3* and *BGLU4*, which cluster around *BGLU6*. We used a reverse

115 genetics approach based on *bglu* loss-of-function mutants and *BGLU* overexpression  
116 lines. Metabolic differences between these expression variant lines were investigated  
117 by untargeted metabolic fingerprinting. We present evidence that the enzymes  
118 encoded by *BGLU1*, *BGLU3* and *BGLU4* show GH1-type GT, probably AGT, activity  
119 in *A. thaliana* leaves (*BGLU1*) and seeds (*BGLU3*, *BGLU4*), acting on glycosylated  
120 flavonols as substrates. *BGLU3* appears to be a multifunctional GT, since several  
121 putative products and substrates of this enzyme were detected.

122

## 123 **Materials and methods**

### 124 *Plant material*

125 *A. thaliana* seeds were obtained from the Nottingham Arabidopsis Stock Center,  
126 including the wild type (wt) Columbia-0 (Col-0) accession and the loss-of-function  
127 transfer DNA (T-DNA) insertion mutants *bglu1-1* (*At1g45191*, GK\_341B12,  
128 N432664), *bglu3-2* (*At4g22100*, GK\_853H01, N481877; Kleinboelting *et al.*, 2012)  
129 and *bglu4-2* (*At1g60090*, SALK\_029729, N25045; Alonso *et al.*, 2003). Homozygous  
130 plants were selected based on PCR-based genotyping (Supplementary Table S1 at  
131 *JXB* online) and kept as mutant lines by selfing. The insertion alleles and genomic  
132 integrity of the T-DNA insertion mutants were verified by long-read sequencing (see  
133 below). Overexpression lines, based on the double enhancer cauliflower mosaic virus  
134 35S (2x35S) promoter (Kay *et al.*, 1987), were generated in Col-0 wt as described  
135 below.

136

### 137 *Plant growth conditions*

138 Unless stated otherwise, plants were grown in the greenhouse under long day  
139 conditions (about 14 h light) at 23 °C and 70% relative humidity (rH). They were  
140 grown in 9 x 9 cm pots on compost “Sondermischung Max Planck Institut 19277634”

141 consisting of 70% white peat (finely ground), 20% vermiculite<sup>®</sup> and 10% sand with pH  
142 6.5; the substrate contained 1 kg m<sup>-3</sup> Osmocote<sup>®</sup> Start 8 Weeks (starting fertilizer);  
143 1 kg m<sup>-3</sup> Triabon<sup>®</sup> (depot fertilizer) and 0.25 kg m<sup>-3</sup> Fe-EDDHA. Plants were fertilized  
144 with Wuxal<sup>®</sup> Super (Manna) and watered as required. Until flowering, pots of the  
145 different genotypes were placed in random order. To prevent cross-pollination at the  
146 flowering stage, pots of the same genotype were placed in trays that were  
147 randomized daily. For seed formation, plants were grown under short day conditions  
148 (8 h light, 22 °C, about 55% rH) for two months before being transferred to long day  
149 conditions. For seed ripening, the temperature was raised to 24 °C. Leaf samples for  
150 gene expression and metabolic studies were obtained from 6-week-old plants, which  
151 were grown for 8 days on 0.5x Murashige and Skoog medium, followed by 5 weeks  
152 of growth in a growth chamber (Percival) with 13 h light at 24 °C and 80% rH (18 °C  
153 and 65% rH at night).

154

#### 155 *Long-read sequencing of genomic DNA*

156 For long-read sequencing of homozygous *bglu1-1*, *bglu3-2* and *bglu4-2* mutants,  
157 high molecular weight genomic DNA was extracted from young rosette leaves and  
158 analyzed as described (Pucker *et al.*, 2021). Library preparation followed the SQK-  
159 RAD004 (*bglu3-2*) or SQK-LSK109 (*bglu1-1*, *bglu4-2*) protocol (Oxford Nanopore  
160 Technologies) and sequencing was performed on R9.4.1 and R10 flow cells  
161 (Supplementary Table S2). The sequencing data were submitted to the *European*  
162 *Nucleotide Archive under study ID PRJEB36305: bglu1-1* (ERS4255859), *bglu3-2*  
163 (*ERS4255860*) and *bglu4-2* (*ERS4255861*). The identified T-DNA::genome junctions  
164 were confirmed by Sanger sequencing of PCR amplicons.

165

#### 166 *RNA isolation and cDNA synthesis*

167 Informed by RNA-Seq-derived expression data from the TraVa website (Klepikova *et*  
168 *al.*, 2016), RNA was isolated from plant parts with the highest *BGLU* expression in  
169 Col-0 wt. Around 10 mm long rosette leaves were used for *BGLU1* (813 read counts  
170 by median normalization, see TraVa), dry mature seeds for *BGLU3* (4,006 read  
171 counts) and mature seeds soaked in water on a wet filter paper for 24 h in the dark  
172 for *BGLU4* (4,062 read counts). Seed samples were taken from multiple plants grown  
173 in the same batch. RNA isolation was performed using the Spectrum™ Plant Total  
174 RNA Kit (Protocol A; Sigma-Aldrich) according to the supplier's instructions, including  
175 DNase I digestion. Seed RNA samples for RT-PCR were precipitated with 8 M LiCl  
176 as described (Suzuki *et al.*, 2004). cDNA was synthesized from 1 µg total RNA using  
177 the ProtoScript® II First Strand cDNA Synthesis Kit (NEB) with d(T)<sub>23</sub>VN primer.

178

#### 179 *cDNA cloning*

180 Full-length coding sequence (CDS) constructs of *BGLU1*, *BGLU3* and *BGLU4* were  
181 created using the GATEWAY® Technology (Invitrogen). PCRs were performed with  
182 the Q5® High Fidelity DNA Polymerase (NEB) and specific, *attB* recombination site-  
183 containing primers (Supplementary Table S1). The resulting amplicons were  
184 recombined into the GATEWAY® vector pDONR™/Zeo with BP clonase resulting in  
185 entry constructs. All constructs were verified by Sanger sequencing.

186

#### 187 *Generation of BGLU overexpression lines*

188 The full-length *BGLU1*, *BGLU3* or *BGLU4* CDSs from the entry constructs were  
189 introduced into the binary expression vector pLEELA (Jakoby *et al.*, 2004) using  
190 GATEWAY® LR clonase. The T-DNA from the resulting plasmid constructs with  
191 *2x35S::BGLU::35S-polyA* expression cassettes was transferred into *A. thaliana* via  
192 *Agrobacterium tumefaciens*-mediated [Agrobacterium, GV101::pMP90RK; Koncz and



193 Schell, 1986] gene transfer by floral dip (Clough and Bent, 1998). Positive lines were  
194 identified by BASTA-selection and confirmed by PCR-based genotyping. Transgene  
195 expression was analyzed in rosette leaves for the *2x35S::BGLU1*, *2x35S::BGLU3*  
196 and *2x35S::BGLU4* lines by RT-PCR to select lines with the highest *BGLU* transcript  
197 levels.

198

#### 199 *Differential gene expression of BGLU1, BGLU3 and BGLU4*

200 Gene expression for *BGLU1*, *BGLU3* and *BGLU4*, respectively, was examined in  
201 biological triplicates (*BGLU1*: leaves of single plants, *BGLU3/BGLU4*: seeds from  
202 several plants) by reverse transcriptase quantitative real-time PCR (RT-qPCR).

203 Sample collection for RNA isolation was performed as described for the metabolic  
204 analyses (see below). Intact transcripts of the *bglu* mutants were quantified using  
205 intron-spanning amplicons, with primers designed using the Python script

206 *find\_primers.py* ([https://github.com/hschilbert/Primer\\_design](https://github.com/hschilbert/Primer_design)). RT-qPCR was

207 performed in technical triplicates using the Luna<sup>®</sup> Universal qPCR Master Mix (NEB)  
208 in a CFX96 Touch<sup>™</sup> Real-Time PCR Detection System (Bio-Rad, 39 cycles).

209 Transcript levels were quantified relative to the wt, using the  $2^{-\Delta\Delta C_t}$  method (Livak and  
210 Schmittgen, 2001) and the geometric mean of the reference genes *PEROXIN4*

211 (*At5g25760*) and *EF1 $\alpha$*  (*At5g60390*) (Vandesompele *et al.*, 2002). The additive error

212 was calculated for the asymmetrically distributed standard errors relative to the

213 mean. If  $C_t$  values in the *bglu* samples were zero, the maximum cycle number plus

214 one ( $C_t = 40$ ) was taken for calculations. To compare the gene expression levels with

215 the intensities of metabolic features that may represent products and/or substrates of

216 the enzymes encoded by the investigated genes (metabolic fingerprinting, see

217 below), reverse transcriptase semi-quantitative PCR (RT-PCR) was applied as fast

218 approach. This was done with the plants that were used for metabolic analyses and  
219 with *ACTIN2* (*At3g18780*) as reference gene.

220

### 221 *Subcellular localization of BGLU-RFP fusion proteins*

222 Full-length *BGLU1*, *BGLU3* or *BGLU4* CDSs were introduced into the binary  
223 expression vector pUBC-RFP-Dest (Grefen *et al.*, 2010) using GATEWAY® LR  
224 clonase, resulting in *pUBQ10::BGLU::RFP* fusion constructs. *2x35S::GFP* in  
225 pAVA393 (Nesi *et al.*, 2001) was used as control for cytoplasmic and nuclear  
226 localization (von Arnim *et al.*, 1998). TRANSPARENT TESTA13 (TT13)-GFP  
227 (*p35S::TT13-GFP* in pK7FWG2) (Appelhagen *et al.*, 2015) was used as an  
228 endomembrane control for vacuolar localzation. The constructs were (co-)transfected  
229 into tobacco Bright Yellow-2 (BY-2) protoplasts as previously described (Haasen *et*  
230 *al.*, 1999), using 30 µg (single transfection) or 20 µg (co-transfection) DNA of each  
231 plasmid. RFP and GFP fluorescence were detected after 24 h of incubation in the  
232 dark using an inverted confocal laser scanning microscope 780 (LSM 780, Zeiss)  
233 with a water-immersion oil objective (LCI Plan-Neofluar 63x /1.3 Imm Korr DIC M27,  
234 Zeiss) and the main beam splitter MBS488/561. An argon ion laser at 488 nm (GFP)  
235 or a diode-pumped solid-state laser at 561 nm (RFP) was used for excitation and  
236 detection at 493–551 nm (GFP) or 582–702 nm (RFP), respectively. Images were  
237 acquired with a pixel dwell time of ≤ 6.3 µs, an intensity resolution of 12 or 16 bit per  
238 pixel, an 8- to 16-fold averaging (depending on noise) and adjusted similar maximal  
239 brightness in both channels to correct photostability and brightness differences of  
240 GFP and RFP. Images were processed using ZEN (2011, Zeiss) and Fiji (ImageJ)  
241 v2.0.0 (Schindelin *et al.*, 2012). Co-localization was visualized with merged images,  
242 where pixels with positive signals for RFP and GFP are shown in white as described  
243 (Dunn *et al.*, 2011).

244

### 245 *Untargeted metabolic fingerprinting*

246 Metabolic fingerprinting was used to screen for candidate product and substrate  
247 metabolites of the biosynthetic reactions catalyzed by the investigated enzymes. For  
248 each investigated *BGLU* gene, a sample set containing (i) the *bglu* loss-of-function  
249 mutant (*bglu1-1*, *bglu3-2* or *bglu4-2*), (ii) the wt and (iii) the overexpression line  
250 (*2x35S::BGLU1* #6, *2x35S::BGLU3* #44 or *2x35S::BGLU4* #91) was prepared. The  
251 plant part with the highest *BGLU* gene expression in the wt (see above) was used for  
252 the metabolic analyses. For *BGLU1* samples, four to six rosette leaves of 6-week-old  
253 plants were harvested 6 h after artificial sunrise. For *BGLU3* samples, 150 mg dry  
254 mature seeds were used, and for *BGLU4* samples 120 mg seeds, which were sown  
255 on wet filter paper to soak with water for 24 h in the dark (all seeds were 5 to 6  
256 months old, derived from a pool of plants). Four biological replicates were prepared  
257 for each genotype. Samples were flash frozen in liquid nitrogen, stored at  $-80\text{ }^{\circ}\text{C}$ ,  
258 lyophilized and ground. Extraction and analysis of (semi)-polar metabolites were  
259 performed as described (Schrieber *et al.*, 2019) with some modifications. Samples  
260 (10 mg powder) were extracted threefold in ice-cold 90% (v:v) methanol (LC-MS  
261 grade; Fisher Scientific UK Limited or Th. Geyer GmbH & Co. KG), supplemented  
262 with luteolin 7-O-glucoside (Extrasynthese) as internal standard. Pooled supernatants  
263 were filtered using Phenex™ syringe filters (0.2  $\mu\text{m}$ , Phenomenex®). One blank was  
264 prepared for each set of ten samples.

265 Samples were analyzed using an ultra-high performance liquid chromatograph  
266 (Dionex UltiMate 3000, Thermo Fisher Scientific) and a quadrupole time-of-flight  
267 mass spectrometer (compact, Bruker Daltonics) in positive electrospray ionization  
268 (ESI<sup>+</sup>) mode. Separation was done on a Kinetex XB-C18 column (1.7  $\mu\text{m}$ , 150 mm x  
269 2.1 mm, with guard column; Phenomenex) at 45  $^{\circ}\text{C}$  with a flow rate of 0.5 ml min<sup>-1</sup>.

270 As mobile phases, 0.1% (v:v) formic acid (~98%, LC-MS grade, Honeywell Research  
271 Chemicals, Fluka) in H<sub>2</sub>O<sub>MilliQ</sub> (phase A) and 0.1% formic acid in acetonitrile (LC-MS  
272 grade; Fisher Scientific or HiPerSolv CHROMANORM, VWR) (phase B) were used,  
273 with a gradient increasing linearly from 2% to 30% B within 20 min and to 75% B  
274 within 9 min, followed by column cleanup and equilibration. A nebulizer (N<sub>2</sub>) pressure  
275 of 3 bar, an end plate offset of 500 V, a capillary voltage of 4,500 V and N<sub>2</sub> as drying  
276 gas (275 °C, flow rate: 12 l min<sup>-1</sup>) were used. A Na(HCOO)-based calibration solution  
277 was introduced to the ESI sprayer before or after each sample. Line mass spectra  
278 were recorded in the mass-to-charge (*m/z*) range of 50–1,300 *m/z* at 1-8 Hz,  
279 depending on the type of sample (plant part) and peak heights; the same spectra rate  
280 was used for samples to be compared (see below). The MS parameters were: 4 eV  
281 quadrupole ion energy, a low mass with an *m/z* value of 90, 7 eV collision energy,  
282 75 μs transfer time and 6 μs pre-pulse storage. To obtain fragment (MS/MS) spectra  
283 of the ions with the highest intensities, the Auto-MS/MS mode was used with N<sub>2</sub> as  
284 collision gas and the isolation widths and collision energies increased with the *m/z* of  
285 the precursors. To aid in metabolite identification, some samples were additionally  
286 measured at low spectra rates (1–3 Hz) and using multiple reaction monitoring to  
287 specifically fragment certain ions, sometimes using different collision energies. Some  
288 samples were also measured in negative electrospray ionization mode (ESI<sup>-</sup>;  
289 capillary voltage 3,000 V) for aglycone identification; since these measurements were  
290 performed at different time points, the retention times in ESI<sup>+</sup> and ESI<sup>-</sup> modes slightly  
291 differ.

292 Mass axis recalibration using the Na(HCOO) calibrant and picking of metabolic  
293 features [each characterized by a retention time (RT) and *m/z*] including spectral  
294 background subtraction were performed in Compass DataAnalysis v4.4 (Bruker  
295 Daltonics). The "Find Molecular Features" algorithm of the Bruker DataAnalysis

296 software was used for feature picking, with the following settings: signal-to-noise  
297 threshold 3 (or 1 if measured at 1 Hz), correlation coefficient threshold 0.75;  
298 depending on the spectra rates, minimum compound lengths were set to 5-22  
299 spectra and smoothing widths to 0-6. Using Compass ProfileAnalysis v2.3 (Bruker  
300 Daltonics), metabolic features likely to belong to the same metabolite (i.e., [M+H]<sup>+</sup>  
301 ions, common adducts and fragments with corresponding isotopes and charge  
302 states) were grouped together in so-called buckets. The split-buckets-with-multiple-  
303 compounds option was selected to separate the internal standard from a peak with  
304 similar RT and *m/z* in seed samples. Each bucket was reduced to the feature with the  
305 highest intensity in that bucket and this feature was used for quantification via its  
306 peak height. These features were aligned across samples, allowing RT deviations of  
307 0.1 or 0.2 min and *m/z* deviations of 6 mDa, respectively. Features within the  
308 injection peak and those with peak heights above detector saturation were excluded.  
309 Peak heights were related to the height of the [M+H]<sup>+</sup> ion of the internal standard.  
310 Based on the resulting values, features were retained in the data set of the  
311 corresponding gene, if their mean intensity in at least one genotype of a sample set  
312 (*bglu* mutant, wt, 2x35S::*BGLU* line) was at least 50 times higher than the  
313 corresponding intensity in the blanks. Moreover, features had to be present in at least  
314 three of the four biological replicates in at least one genotype. Finally, the feature  
315 intensities were divided by the sample dry weight.

316

### 317 *Screening for and (partial) identification of metabolites*

318 To screen for metabolites that may represent products and substrates of the  
319 enzymes encoded by *BGLU1*, *BGLU3* and *BGLU4*, fold changes (FCs) were  
320 calculated. For this, the mean intensities of all metabolic features in the *BGLU*  
321 expression variant lines were divided by the corresponding mean intensities in the wt

322 if at least one genotype in the pairwise combination showed peaks in at least three  
323 replicates. Candidate product features were selected based on higher peaks in  
324 *2x35S::BGLU* than in wt samples ( $FC \geq 1.5$  or present only in *2x35S::BGLU* but not  
325 in wt samples) and/or lower peaks in *bglu* than in wt samples ( $FC \leq 0.67$  or only  
326 occurring in wt but not in *bglu* samples). Candidate substrate features were selected  
327 by screening for the opposite peak intensity patterns. Extracted ion chromatograms  
328 of the *m/z* belonging to the features of interest were manually reviewed and features  
329 were considered relevant if the peak intensity patterns across genotypes resembled  
330 the transcript expression patterns from the RT-PCR (candidate products) or showed  
331 the opposite pattern (candidate substrates). This was based on the assumption that  
332 the levels of metabolic products and substrates of an enzyme correlate with the  
333 transcript levels of the corresponding gene. The peak areas of the features of interest  
334 were determined by manual integration in DataAnalysis and divided by the peak area  
335 of the manually integrated *m/z* trace of the  $[M+H]^+$  ion of the internal standard and the  
336 sample dry weight to calculate more accurate (i.e., peak area-based) FCs.

337 Metabolites were putatively and partially identified on the basis of ion types,  
338 accurate *m/z* values and intensities of parent and fragment ions. Sugar moieties were  
339 identified on the basis of accurate calculations of neutral losses; this allowed  
340 differentiation between a hexosyl (neutral loss: 162.0528 Da) and a caffeoyl  
341 (162.0317 Da) moiety as well as between a deoxyhexosyl (146.0579 Da) and a  
342 *p*-coumaroyl (146.0368 Da) moiety. Since deoxyhexosyl substitutions in flavonoids  
343 are most commonly rhamnosyl moieties, we assumed rhamnosyl groups as  
344 deoxyhexosyl substitutions/neutral losses. For structural formula prediction, *in-silico*  
345 fragmentation with MetFrag (Ruttkies *et al.*, 2016) was applied to the ESI<sup>+</sup> fragments,  
346 using the PubChem database (Kim *et al.*, 2019); this was accompanied by spectral

347 matching with entries in the MassBank of North America

348 (<https://mona.fiehnlab.ucdavis.edu/>).

349

## 350 **Results and discussion**

### 351 *Characterization of BGLU expression variant lines for functional studies*

352 The reliability of the results of reverse genetic approaches strongly depends on the

353 availability of suitable, thoroughly characterized mutants. The selected *bglu* T-DNA

354 insertion mutants (*bglu1-1*, *bglu3-2*, *bglu4-2*) were characterized by long-read

355 sequencing and additional Sanger sequencing of amplicons across both

356 T-DNA::genome junctions. These characterizations demonstrated homozygosity of

357 the T-DNA insertion alleles (Supplementary Fig. S1) and single T-DNA insertions in

358 the corresponding *BGLU* genes, without loss of neighboring genes. They also

359 revealed the exact positions, orientations and border sequences of the T-DNA

360 insertions (Fig. 1A, Supplementary Table S2). Thus, the mutants were sufficiently

361 characterized according to current standards (Pucker *et al.*, 2021; Ülker *et al.*, 2008).

362 In *bglu1-1*, the T-DNA was inserted at pseudochromosome 1 position 17,116,579

363 [right T-DNA border (RB)] and position 17,116,598 [left T-DNA border (LB)] in the

364 third intron of *BGLU1*. In *bglu3-2*, the insertion was located at pseudochromosome 4

365 positions 11,709,058 (LB) and 11,708,997 (RB), with the LB in the sixth exon and the

366 RB in the sixth intron of *BGLU3*. In *bglu4-2*, the T-DNA was inserted at

367 pseudochromosome 1 positions 22,156,000 (LB) and 22,156,017 (LB) in the third

368 intron of *BGLU4*. The two LBs were probably derived from an insertion in LB-RB::RB-

369 LB configuration (Kleinboelting *et al.*, 2015; Pucker *et al.*, 2021). In almost all cases,

370 there were additional nucleotides at the T-DNA::genome junctions (Supplementary

371 Table S2) as described for DNA double strand break-based T-DNA insertions

372 (Kleinboelting *et al.*, 2015).

373 With loss-of-function mutants, the functions of genes and the proteins encoded by  
374 them can be revealed, but functional redundancy of genes can prevent or mask a  
375 clear phenotype in single loss-of-function mutants (Bolle *et al.*, 2013; O'Malley and  
376 Ecker, 2010). To overcome this limitation, we also included overexpression lines. The  
377 full-length CDSs of *BGLU1*, *BGLU3* and *BGLU4* under the control of the 2x35S  
378 promoter were stably introduced into *A. thaliana*, generating ten 2x35S::*BGLU1*,  
379 three 2x35S::*BGLU3* and ten 2x35S::*BGLU4* overexpression lines. Transgene  
380 expression was confirmed in rosette leaves by RT-PCR (Supplementary Fig. S2). For  
381 each *BGLU* gene, the line with the strongest *BGLU* overexpression was selected for  
382 further experiments: 2x35S::*BGLU1* #6, 2x35S::*BGLU3* #44 and 2x35S::*BGLU4* #91.  
383 For final characterization, intact *BGLU* transcripts were examined by RT-qPCR and  
384 compared between the genotypes. The plant parts with highest gene expression  
385 levels in the wt (see Material and Methods) were chosen: rosette leaves for *BGLU1*,  
386 dry mature seeds for *BGLU3* and 24 h water-soaked mature seeds for *BGLU4*.  
387 Compared to the wt, the insertion mutants showed lower (FC: 0.04 for *bglu1-1*, 0.001  
388 for *bglu3-2*, 0.0005 for *bglu4-2*) and the overexpression lines much higher (FC: 67.3  
389 for 2x35S::*BGLU1*, 25.1 for 2x35S::*BGLU3*, 35.8 for 2x35S::*BGLU4*) relative target  
390 gene expression values (Fig. 1B). Thus, the chosen *BGLU* expression variant lines  
391 were suitable to screen for potential metabolic products and substrates. Several  
392 metabolic features possibly representing products and substrates of the encoded  
393 enzymes were found (see below; Fig. 2, Supplementary Table S3, S4, S5). Feature  
394 names are based on the RT and *m/z* values derived from feature picking and  
395 subsequent alignment across samples; *m/z* and RT values of the mass spectra may  
396 differ slightly from these values, because spectra were taken from single samples  
397 with high feature intensities.

398



399 *BGLU1* is a putative GH1-type flavonol glycosyltransferase

400 In the *BGLU1* data set (rosette leaves of wt, *bglu1-1*, *2x35S::BGLU1*), one candidate  
401 product feature (*m/z* value of 741.2221 at RT 10.82 min) was found, whose intensity  
402 pattern mirrored the gene expression pattern (Fig. 2, Supplementary Fig. S3). Low  
403 *BGLU1* transcript levels were still detected in the insertion mutant *bglu1-1*, probably  
404 due to the fact that the inserted T-DNA is located in the middle of a long intron (Fig.  
405 1A) and that the primary transcript of the insertion allele was presumably spliced  
406 correctly in some cases. This may explain the occurrence of the candidate product  
407 feature (*m/z* of 741) at low levels in the *bglu1-1* samples.

408 There are several indications that the putative product of BGLU1 (feature with *m/z*  
409 741.2221 at 10.82 min) is a triglycosylated kaempferol with the molecular formula  
410 C<sub>33</sub>H<sub>40</sub>O<sub>19</sub> and an average molecular weight of 740.6606 Da. The presence of three  
411 O-bound sugars is suggested by the successive loss of two deoxyhexosyl (probably  
412 rhamnosyl) moieties (fragment with *m/z* 595: [precursor-146]<sup>+</sup>; fragment with *m/z*  
413 449: [precursor-146-146]<sup>+</sup>) and one hexosyl moiety (fragment with *m/z* 287:  
414 [precursor-146-146-162]<sup>+</sup>) in the ESI<sup>+</sup> mode (Fig. 3A). In addition, a minor fragment  
415 with an *m/z* value of 433 was visible, which can be explained by the loss of one  
416 rhamnosyl and one hexosyl moiety ([precursor-146-162]<sup>+</sup>).

417 The fragment with an *m/z* value of 287 indicates that the precursor (parent ion *m/z*  
418 741) may be an [M+H]<sup>+</sup> ion with kaempferol (a flavonol) as aglycon or an [M]<sup>+</sup> ion with  
419 cyanidin (an anthocyanidin) as aglycon. Glycosides with these backbones can be  
420 distinguished by the ion types they form in ESI<sup>-</sup> mode (Sun *et al.*, 2012). While  
421 flavonol glycosides produce mainly [M-H]<sup>-</sup> ions, anthocyanins form pronounced [M-  
422 2H]<sup>-</sup> and [M-2H+H<sub>2</sub>O]<sup>-</sup> ions as well as formic acid adducts related to both ion types;  
423 doubly charged ions corresponding to these ions also may occur. In the ESI<sup>-</sup> mode,  
424 we detected an ion with an *m/z* value of 739, which may be an [M-H]<sup>-</sup> ion of a

425 kaempferol triglycoside or an  $[M-2H]^-$  ion of a cyanidin triglycoside. The occurrence  
426 of a putative formic acid adduct ( $m/z$  785) of this ion at the same RT does not fit to a  
427 flavonol, as these usually do not show formic acid adducts. However, the facts that  
428 there was no obvious ion with  $m/z$  757, which would be the  $[M-2H+H_2O]^-$  ion  
429 expected for a cyanidin triglycoside and that there was no formic acid adduct of this  
430 ion suggest that the aglycon may be kaempferol. Fragmentation of the ion ( $m/z$  739)  
431 revealed a dominant fragment with an  $m/z$  value of 577 (Fig. 3B), supporting that the  
432 metabolite contains an *O*-bound hexosyl moiety; the slight deviation of the accurate  
433 mass of the neutral loss (162.04) from the expected value (162.05) may be due to the  
434 low peak intensities. In contrast to the ESI<sup>+</sup> mode, in ESI<sup>-</sup> mode no fragments  
435 belonging to further losses of sugar moieties and no aglycon fragment were found,  
436 making further conclusions difficult. *In-silico* fragmentation in MetFrag using the ESI<sup>+</sup>  
437 data further supported a triglycosylated kaempferol, as the two best hits were  
438 kaempferol 3-[6-*O*-(3-*O*- $\alpha$ -L-rhamnopyranosyl)- $\alpha$ -L-rhamnopyranosyl]- $\beta$ -D-  
439 glucopyranosyloxide] (PubChem CID: 101502553) and kaempferol 3-*O*-[ $\alpha$ -L-  
440 rhamnopyranosyl(1 $\rightarrow$ 2)- $\beta$ -D-galactopyranosyl]-7-*O*- $\alpha$ -L-rhamnopyranoside) (CID:  
441 57397583).

442 Our putative metabolite identification is in good agreement with published results (Wu  
443 *et al.*, 2018). Genome-wide association studies, using untargeted LC-MS metabolic  
444 fingerprinting of 309 *A. thaliana* accessions, revealed a feature ( $m/z$  741.2220, ESI<sup>+</sup>)  
445 with a MS/MS spectrum similar to the one we found. This metabolic trait was traced  
446 back to the *BGLU1* locus. The metabolite-gene correlation was validated by the  
447 analysis of a *bglu1* mutant (SALK\_060948 allele), which showed lower levels of the  
448 feature with  $m/z$  741.2220. The authors were unable to identify the compound but  
449 showed that the feature was also associated with the *UGT78D1* locus, which

450 encodes a kaempferol and quercetin 3-O-rhamnosyltransferase UGT (Jones *et al.*,  
451 2003), suggesting that the metabolite may be 3-O-rhamnosylated.

452 In general, diverse kaempferol O-glycosides occur in *A. thaliana* leaves, varying in  
453 the number, type and positions of sugars (Hectors *et al.*, 2014; Tohge *et al.*, 2005),  
454 with C-3 and C-7 being the most common glycosylation sites (Stobiecki *et al.*, 2006).  
455 For the feature of interest in the current study ( $m/z$  741), the assumed loss of a  
456 hexosyl moiety from the  $[M-H]^-$  ion observed in ESI<sup>-</sup> mode (fragment with  $m/z$  577)  
457 indicates that the hexosyl group is bound at a terminal position. The C-3 position is  
458 more prone to fragmentation in ESI<sup>+</sup> mode, whereas the C-7 position is readily  
459 fragmented in ESI<sup>-</sup> mode (Kachlicki *et al.*, 2016; Stobiecki *et al.*, 2006). Thus, the  
460 prominent fragment with  $m/z$  449 in ESI<sup>+</sup> mode ( $[M+H-146-146]^+$ ) suggests that a  
461 rhamnosyl-rhamnosyl moiety is bound to the C-3 position, whereas the dominant  
462 fragment with  $m/z$  577 in ESI<sup>-</sup> mode ( $[M-H-162]^-$ ) may indicate that the hexosyl  
463 moiety is linked to the C-7 position.

464 Taken together, although we cannot rule out that the sugars are attached at other  
465 positions, our study provides evidence that the feature ( $m/z$  741.2221 at 10.82 min) is  
466 a kaempferol 3-O-dirhamnoside 7-O-hexoside. We hypothesize that BGLU1 is a  
467 GH1-type flavonol glycosyltransferase catalyzing the transfer of a further sugar to an  
468 already di-glycosylated kaempferol derivative with a rhamnosyl moiety at the C-3  
469 position (see hints from literature above). BGLU1 may transfer either a hexosyl  
470 moiety to the C-7 position of kaempferol 3-O-dirhamnoside or a second rhamnosyl to  
471 the C-3 rhamnosyl moiety of kaempferol 3-O-rhamnoside 7-O-hexoside. Phylogenetic  
472 clustering of GTs correlates with the glycosylation sites of the substrates (Jackson *et*  
473 *al.*, 2011; Vogt and Jones, 2000) and BGLU1 clusters with BGLU6 (Ishihara *et al.*,  
474 2016; Miyahara *et al.*, 2011). BGLU6 catalyzes the transfer of another glucosyl  
475 moiety to the glucosyl moiety at C-3 of a flavonol 3-O-glucoside 7-O-rhamnoside in

476 *A. thaliana* (Ishihara *et al.*, 2016). Therefore, we assume that BGLU1 is responsible  
477 for the transfer of a second rhamnosyl to the rhamnosyl moiety at C-3. However, to  
478 our knowledge, GH1-type flavonol rhamnosyltransferases have not been reported in  
479 plants so far. Since no candidate substrate feature was found for BGLU1, we cannot  
480 exclude that BGLU1 catalyzes the sugar transfer to a monoglycoside (presumably  
481 kaempferol 3-O-rhamnoside, see above) and that the third sugar is transferred by  
482 another enzyme; in this case, the intermediate diglycoside might have been below  
483 the detection limit, perhaps due to rapid metabolism. We also cannot fully rule out a  
484  $\beta$ -glycosidase activity of BGLU1, but there were no candidate features indicating this.  
485

486 *BGLU3 is a putative multifunctional GH1-type flavonoid glycosyltransferase*

487 For the BGLU3 data set (dry mature seeds of wt, *bglu3-2*, *2x35S::BGLU3*), the FC  
488 screening revealed three main candidate product features and three main candidate  
489 substrate features, each with high peak intensities. In addition, some minor or less  
490 intense candidate features were detected (Fig. 2, Supplementary Table S3, S5). The  
491 intensity patterns of these features were generally consistent with the *BGLU3*  
492 transcript levels (Fig. 2, Supplementary Fig. S3, Supplementary Table S5). Relatively  
493 similar feature intensities were determined in the wt and *2x35S::BGLU3* samples, but  
494 lower (product features) and higher (substrate features) intensities, respectively, in  
495 the *bglu3-2* mutant. The reason for the comparable transcript levels in *2x35S::BGLU3*  
496 and wt is unclear. Although insertion of the transgene into a region with low  
497 transcriptional activity (Nagaya *et al.*, 2005) cannot be ruled out, metabolite-mediated  
498 negative feedback regulation of gene expression (Xu *et al.*, 1999) might also be  
499 involved. The occurrence of candidate product features at low levels in the *bglu3-2*  
500 mutant, which lacks *BGLU3* expression, may indicate functional redundancies  
501 conferred by other enzymes.

502 The candidate product feature with an  $m/z$  value of 866.4164 at 11.75 min and the  
503 corresponding putative substrate ( $m/z$  704.3635 at 13.11 min) indicate a  
504 hexosyltransferase activity of BGLU3, as the  $m/z$  difference between these ions of  
505 162.05 matches to a hexosyl moiety. The product-substrate relationship between  
506 these features is further supported by their similar fragmentation patterns (Fig. 4A,  
507 4B). Both features showed a major fragment indicating a  $\text{CO}_2$  loss ( $[\text{precursor}-44]^+$ ;  
508 fragments with  $m/z$  822 and  $m/z$  660 for the candidate product and candidate  
509 substrate feature, respectively), which may indicate a carboxyl function in the  
510 metabolites. Furthermore, a neutral loss of 226 Da (fragments with  $m/z$  640 and  $m/z$   
511 478, respectively) and fragments at  $m/z$  values of 398 and 339 were observed for  
512 both. In addition to the similar fragmentation, both features showed co-eluting doubly  
513 charged features. While the feature with  $m/z$  433.7128 at 11.76 min probably  
514 represents the doubly-charged version ( $[\text{M}+\text{H}]^{2+}$ , explanation see below) of the  
515 candidate product feature ( $m/z$  866), the feature with  $m/z$  330.6915 at 13.11 min may  
516 be an  $[\text{M}+\text{H}-\text{CO}_2]^{2+}$  ion belonging to the candidate substrate feature ( $m/z$  704)  
517 (Supplementary Table S3). The structure of the metabolites could not be determined.  
518 However, the high  $m/z$  may indicate that they are condensed flavonoids. The doubly  
519 charged ions may be due to the presence of a naturally positively charged  
520 anthocyani(di)n moiety ( $[\text{M}]^+$  ion), which together with a protonation at another unit of  
521 the metabolite leads to a double charge ( $[\text{M}+\text{H}]^{2+}$ ). Although some fragments pointed  
522 to a carboxypyranomalvidin-hexoside (a pyranoanthocyanin) (Fulcrand *et al.*, 1998)  
523 and an (epi)gallocatechin (a flavanol) (Nave *et al.*, 2010; Sánchez-Ilárduya *et al.*,  
524 2012) as potential units of the candidate product, the overall  $m/z$  of the candidate  
525 product and substrate features did not support this combination. Some further minor  
526 candidate product features were found, many of them being doubly charged as well  
527 and showing mixtures of singly and doubly charged fragments (Supplementary Table

528 S3, S5). Some of the corresponding metabolites may be derived from the metabolite  
529 belonging to the feature with  $m/z$  866 via further biosynthesis pathways  
530 (Supplementary Table S4). Among the minor candidate features, the product with  
531  $m/z$  411.7178 (11.87 min; doubly charged, putatively  $[M+H]^{2+}$ ) may be related to the  
532 substrate with  $m/z$  660.3742 (13.21 min; singly charged, putatively  $[M]^+$ ), with the  
533 features differing in a hexosyl moiety. This product/substrate pair seems to be  
534 chemically similar to the product/substrate pair with  $m/z$  866 (433 in doubly charged  
535 version) / 704, with a carboxyl function less (44 Da difference,  $CO_2$ ).

536 The structure of the candidate substrate feature with  $m/z$  781.3270 at 15.38 min  
537 could also not be resolved. However, this substrate seems to contain a hexosyl  
538 moiety (neutral loss of 162.06 Da, fragment  $m/z$  619) and we found a minor  
539 candidate product feature with  $m/z$  943.3804 at 13.74 min, which differed by 162.05  
540 Da (i.e., a hexosyl) and showed some similar MS/MS fragments (Fig. 4C,  
541 Supplementary Tables S3, S5). This suggests that BGLU3 transfers an additional  
542 hexosyl moiety. Some of the minor candidate BGLU3 substrate features showed  
543 similar characteristics and thus probably represent similar metabolites  
544 (Supplementary Table S3). More studies on flavonoids and their condensation  
545 reactions are needed to provide further information on whether the features observed  
546 in our study are (condensed) flavonoids. In any case, our study suggests that BGLU3  
547 acts in the seeds and transfers hexosyl moieties to complex substrates.

548

549 Our results provide some evidence that BGLU3 also catalyzes a reaction leading to a  
550 triglycosylated quercetin with the molecular formula  $C_{33}H_{40}O_{21}$  and an average  
551 molecular weight of 772.6594 Da, represented by the candidate product feature with  
552 an  $m/z$  of 773.2116 at 10.51 min (Fig. 2, Supplementary Tables S3, S5). The MS/MS  
553 fragments with  $m/z$  449 ( $[precursor-324]^+$ ) and  $m/z$  303 ( $[precursor-324-146]^+$ )

554 indicate the loss of two O-bound hexosyl moieties and of one O-bound deoxyhexosyl  
555 (likely rhamnosyl) moiety (Fig. 5A). Based on the fragment with  $m/z$  303, the parent  
556 ion ( $m/z$  773) could be either an  $[M+H]^+$  ion with quercetin (a flavonol) as aglycon or  
557 an  $[M]^+$  ion with delphinidin (an anthocyanidin) as aglycon. In the ESI<sup>-</sup> mode, the ion  
558 with  $m/z$  771 (Fig. 5B) could represent the  $[M-H]^-$  ion of a quercetin triglycoside or  
559 the  $[M-2H]^-$  ion of a delphinidin triglycoside; as no obvious  $[M-2H+H_2O]^-$  ion ( $m/z$   
560 789) and no formic acid adducts were found, which would indicate an anthocyanidin  
561 aglycon (Sun *et al.*, 2012), we assume that the aglycon is quercetin. Fragmentation  
562 of the ion with  $m/z$  771 supports the presence of one O-bound rhamnosyl ( $[M-H-$   
563 146]<sup>-</sup>; fragment  $m/z$  625) and two O-bound hexosyl moieties ( $[M-H-324]^-$ ;  $m/z$  447)  
564 (Fig. 5B). However, as no aglycon fragment was found in ESI<sup>-</sup> mode, potentially due  
565 to non-optimal collision energies, the identity of the aglycon cannot be further  
566 assessed. Nevertheless, *in-silico* fragmentation using the ESI<sup>+</sup> data also revealed  
567 quercetin triglycosides as best hits. Various quercetin O-glycosides that differ in the  
568 number, type and positions (mainly C-3 and C-7) of the sugars occur in *A. thaliana*  
569 seeds (Kerhoas *et al.*, 2006; Lepiniec *et al.*, 2006; Routaboul *et al.*, 2012; Saito *et al.*,  
570 2013). The neutral loss of a rhamnosyl in ESI<sup>-</sup> mode (fragment with  $m/z$  625) from  
571 the  $[M-H]^-$  ion suggests a terminal position of the rhamnosyl moiety. This and the  
572 loss of a hexosylhexosyl moiety from the parent ions ( $[M+H-324]^+$ , fragment  $m/z$  449;  
573  $[M-H-324]^-$ , fragment  $m/z$  447) may indicate the attachment of the rhamnosyl and  
574 hexosylhexosyl moieties at different positions. We argue that due to the loss of a  
575 hexosylhexosyl from the parent ion in ESI<sup>+</sup> mode (fragment  $m/z$  449), most likely from  
576 the fragmentation at C-3 (Kachlicki *et al.*, 2016; Stobiecki *et al.*, 2006), the feature  
577 with  $m/z$  773 may represent a quercetin 3-O-dihexosyl 7-O-rhamnoside. However, we  
578 cannot rule out that the sugars are attached in a different way. Based on the  
579 assumption that the phylogenetic clustering of glycosyltransferases correlates with

580 the glycosylation site (Jackson *et al.*, 2011; Vogt and Jones, 2000) and on the  
581 clustering of BGLU3 with BGLU6 (Ishihara *et al.*, 2016; Miyahara *et al.*, 2011),  
582 BGLU3 may be responsible for the transfer of the second hexosyl moiety to the C-3  
583 position. Nevertheless, other glycosylation reactions and a  $\beta$ -glycosidase activity  
584 cannot be excluded for BGLU3, for the same reasons as discussed for BGLU1.

585

586 Taken together, our results indicate that BGLU3 acts as a GH1-type  
587 hexosyltransferase, transferring hexosyl moieties to different flavonoids.  
588 Multifunctionality is also known from the GH1-type GT Os9BGlU31 from rice, which  
589 transfers sugar moieties to compounds as diverse as flavonoids, phenolic acids and  
590 phytohormones (Luang *et al.*, 2013). Based on RNA-Seq data (TraVa database),  
591 BGLU3 expression is restricted to seeds, suggesting that the proposed glycosylation  
592 reactions are specific to these plant parts. Indeed, seeds are known to contain  
593 various flavonoids (Kerhoas *et al.*, 2006), some of them being exclusively found in  
594 mature seeds as shown for flavonol 3-O-sophoroside 7-O-rhamnosides in tomato  
595 seeds (Alseekh *et al.*, 2020) or epicatechins in *A. thaliana* seeds (Saito *et al.*, 2013).

596

597 *BGLU4 is a putative GH1-type flavonol glycosyltransferase*

598 The FC screening in the BGLU4 data set (24 h water-soaked mature seeds of wt,  
599 *bglu4-2*, 2x35S::*BGLU4*) revealed one candidate product feature (*m/z* of 757.2149 at  
600 11.71 min; Fig. 2). The pattern of feature intensities was largely similar to that of  
601 *BGLU4* gene expression (Fig. 2, Supplementary Fig. S3). However, the candidate  
602 product was also found in traces in the *bglu4-2* mutant, which showed no *BGLU4*  
603 expression, suggesting functional redundancy.

604 The metabolic analyses suggest that the BGLU4 candidate product (*m/z* 757.2149 at  
605 11.71 min) could be a triglycosylated quercetin (molecular formula C<sub>33</sub>H<sub>40</sub>O<sub>20</sub>,



606 average molecular weight: 756.6600 Da). The fragmentation of this feature in the  
607 ESI<sup>+</sup> mode (Fig. 6A) suggests a loss of a rhamnosyl and a hexosyl moiety (fragment  
608  $m/z$  449, [precursor-146-162]<sup>+</sup>) and a further loss of a rhamnosyl moiety (fragment  
609  $m/z$  303; [precursor-146-162-146]<sup>+</sup>). The fragment with  $m/z$  303 indicates that the  
610 parent ion ( $m/z$  757) could be either an [M+H]<sup>+</sup> ion with quercetin as aglycon or an  
611 [M]<sup>+</sup> ion with delphinidin as aglycon. Measurements in the ESI<sup>-</sup> mode (Fig. 6B)  
612 revealed an ion with  $m/z$  755, which could be the [M-H]<sup>-</sup> ion of a quercetin  
613 triglycoside or the [M-2H]<sup>-</sup> ion of a delphinidin triglycoside. We suggest that the  
614 aglycon is a quercetin, because no obvious ion with  $m/z$  773 ([M-2H+H<sub>2</sub>O]<sup>-</sup> and no  
615 formic acid adducts were found, which would be expected for a delphinidin  
616 triglycoside (Sun *et al.*, 2012), and because *A. thaliana* lacks a gene encoding F3'5'H  
617 activity (Falginella *et al.*, 2010). In addition, the ESI<sup>-</sup> data support the existence of  
618 three sugar moieties (fragment  $m/z$  609: [precursor-146]<sup>-</sup>;  $m/z$  447: [precursor-146-  
619 162]<sup>-</sup>;  $m/z$  301: [precursor-146-162-146]<sup>-</sup>), although the masses of the neutral  
620 losses deviate somewhat, probably due to low intensities. Furthermore, *in-silico*  
621 fragmentation with the ESI<sup>+</sup> data revealed glycosylated quercetins as best hits, most  
622 likely quercetin 3-O-[ $\alpha$ -L-rhamnopyranosyl(1→2)- $\beta$ -D-galactopyranosyl]-7-O- $\alpha$ -L-  
623 rhamnopyranoside (CID: 57397680), quercetin 3-rhamnosyl-(1→4)-rhamnosyl-  
624 (1→6)-glucoside (CID: 44259158) or quercetin 3-rhamnosyl-(1→2)-rhamnosyl-  
625 (1→6)-glucoside (CID: 44259157). In the ESI<sup>+</sup> mode, the neutral loss of 308 Da (one  
626 rhamnosyl and one hexosyl), leading to the prominent fragment with  $m/z$  449, is  
627 probably derived from fragmentation at C-3, whereas the loss of a rhamnosyl moiety  
628 (146 Da; fragment  $m/z$  609) in the ESI<sup>-</sup> mode indicates that this moiety is probably  
629 derived from C-7 (Kachlicki *et al.*, 2016; Stobiecki *et al.*, 2006). Based on the  
630 fragment with  $m/z$  447 (ESI<sup>-</sup>) indicating a hexosyl loss from the fragment with  $m/z$   
631 609 (probably derived from the loss of a rhamnosyl at C-7, see above), we argue that

632 at the C-3 position the rhamnosyl moiety is bound to the backbone and that the  
633 hexosyl moiety is bound to this rhamnosyl and located at the outer position. Thus, the  
634 product of BGLU4 may be a quercetin 3-O-rhamnosyl hexoside 7-O-rhamnoside. As  
635 discussed for the other BGLU proteins above, BGLU4 may transfer a hexosyl moiety  
636 to the already rhamnosylated C-3 position, while we cannot exclude the catalyzation  
637 of another sugar transfer or a  $\beta$ -glycosidase activity.

638

### 639 *BGLU proteins are localized in different cell compartments*

640 GH1-type GTs are assumed to specifically catalyze the glycosylation of already  
641 substituted flavonoids, taking place either at the backbone, at another sugar moiety  
642 or at an acyl moiety (Ishihara *et al.*, 2016; Matsuba *et al.*, 2010; Miyahara *et al.*,  
643 2013). Most of these enzymes have a predicted localization signal for the vacuole,  
644 where flavonoid modifications by GHs and GTs also seem to take place (Luang *et al.*,  
645 2013; Sasaki *et al.*, 2014). In subcellular localization experiments using BY-2  
646 protoplasts, all BGLU-RFP fusion proteins were found to be localized in the  
647 cytoplasm, mostly at endomembranes around the nucleus (Fig. 7). BGLU3 and  
648 BGLU4 were also localized in the nucleus. In addition, all proteins (especially  
649 BGLU4) showed a weak localization in the vacuole in some protoplasts. Likewise,  
650 Ishihara *et al.* (2016) revealed subcellular localization of BGLU6 in the cytoplasm and  
651 Matsuba *et al.* (2010) demonstrated that one AGT is localized in the cytoplasm and  
652 vacuole. In the present study, the subcellular endomembrane control fusion protein  
653 TT13-GFP showed co-localization of the investigated BGLUs with endomembranes  
654 around the nucleus, probably the rough endoplasmatic reticulum (ER) (Fig. 7). This  
655 suggests that the BGLU proteins are synthesized at the rough ER and are  
656 subsequently transported to the vacuole by vesicular traffic through the cytoplasm.

657

658 *Putative functions and relevance of GH1-type GTs*

659 In summary, the screening of metabolites in different *BGLU* genotypes with  
660 genetically modified expression levels by metabolic fingerprinting suggests that the  
661 proteins encoded by *BGLU1*, *BGLU3* and *BGLU4* possess GH1-type glycosylation  
662 activity on glycosylated flavonoids. All three BGLUs appear to be involved in the  
663 synthesis of triglycosides, with BGLU1 most likely acting on a kaempferol diglycoside  
664 and BGLU3 and BGLU4 acting on different quercetin diglycosides. BGLU3 possibly  
665 also acts on other substrates, possibly condensed flavonoids.

666 Thus, our study suggests a broader range of functions of GH1-type GTs in plants  
667 than uncovered yet. The precise functions in terms of metabolic steps catalyzed by  
668 the enzymes and the biological functions of the metabolites remain to be determined.

669 In general, it is suggested that GH1-type GTs act on already substituted flavonoids in  
670 the vacuole, where the acyl-sugar donor is located, while UGTs act in the cytoplasm,  
671 where they are co-localized with the UDP-sugar donor (Matsuba *et al.*, 2010; Sasaki  
672 *et al.*, 2014). Further studies on the subcellular localization and the activity of the  
673 enzymes in these compartments are needed. Also, the localization at  
674 endomembranes around the nucleus needs to be further clarified. If BGLU1, BGLU3  
675 and BGLU4 are localized in the vacuole, they could act as AGTs, using sinapoyl-  
676 sugars as acyl-sugar donors, which are common in *A. thaliana* (Meißner *et al.*, 2008;  
677 Miyahara *et al.*, 2013).

678 The occurrence of many different GH1-type GTs may be related to the assumption  
679 that larger gene families, like the *BGLUs*, are based on plant part-specific expression  
680 of different paralogous genes (Cao *et al.*, 2017; Gómez-Anduro *et al.*, 2011). The  
681 glycosylated flavonoid products may be involved in plant responses to abiotic and  
682 biotic stresses, contributing to the enormous diversity of highly substituted flavonoids  
683 (Saito *et al.*, 2013). Investigation of the transcriptional regulation of GH1-type GTs

684 could provide insight into the biosynthetic pathways in which the enzymes are  
685 involved and their specific functions. Interestingly, Geng *et al.* (2021) were able to  
686 predict a gene co-expression module involved in flavonoid biosynthesis and stress  
687 response, including BGLU1, using the transcription factor activity-based expression  
688 prediction tool EXPLICIT. This module is based on transcription factors known to  
689 regulate structural flavonoid biosynthesis pathway genes.

690 Because the putative metabolite products were present at low levels in *bglu* mutants,  
691 future studies including multiple loss-of-function mutants should address potential  
692 functional redundancies and evolutionary sub-/neofunctionalization of *BGLU* genes.  
693 For example, such a functional redundancy is known for the *A. thaliana* anthranilate  
694 GTs UGT74F1 and UGT74F2 (Quiel and Bender, 2003) and is proposed for the  
695 *A. thaliana* AGTs BGLU10 and BGLU9 (Miyahara *et al.*, 2013). Based on amino acid  
696 similarities (Miyahara *et al.*, 2011) and gene expression in the same plant parts  
697 (TraVA, present study), BGLU5 and BGLU1 may have redundant roles in rosette  
698 leaves and the same may be the case for BGLU3 and BGLU4 in seeds. That BGLU3  
699 may have a redundant enzymatic function with BGLU4 is supported by a minor  
700 candidate product feature (*m/z* 757.2166, 11.42 min) of BGLU3, exhibiting a similar  
701 fragmentation pattern as the BGLU4 candidate product with *m/z* 757.2149 at 11.71  
702 min (Fig. 6; Supplementary Table S3), thus probably being an isomer of this  
703 compound. Finally, unambiguous structure validation requires measurements of  
704 reference standards in combination with NMR measurements. Both is challenging,  
705 because standards are not available for many complex flavonoids and NMR analyses  
706 require large amounts of purified compounds, which are almost impossible to  
707 generate, especially for metabolites from tiny *A. thaliana* seeds.

708 This work is a further step towards more detailed information about the abundance  
709 and function of GH1-type glycosyltransferases in plants and more precisely in

710 *A. thaliana*. The data obtained also provide several hints towards the glycosylation  
711 activity on diverse substrates, which to our knowledge have not been reported in  
712 *A. thaliana* and are an interesting prospect for future studies.

713

#### 714 **Supplementary data**

715 Supplementary data are available at *JXB* online.

716 *Table S1*. Primers used in this study.

717 *Table S2*. Oxford Nanopore Technologies sequencing data sets.

718 *Table S3*. BGLU3 candidate features in ESI<sup>+</sup> mode.

719 *Table S4*. Putative modifications explaining further BGLU3 candidate products in  
720 ESI<sup>+</sup> mode.

721 *Table S5*. Processed measurement data.

722 *Fig. S1*. Oxford Nanopore Technologies long-read sequencing of T-DNA insertion  
723 mutants.

724 *Fig. S2*. Transgene expression in 2x35S::BGLU lines.

725 *Fig. S3*. Transcript levels of BGLU1, BGLU3 and BGLU4 in the expression variant  
726 lines.

727

#### 728 **Acknowledgements**

729 We are grateful to Melanie Kuhlmann for her excellent assistance in the laboratory  
730 and to Andrea Voigt for her competent help in the greenhouse. We thank Hanna  
731 Marie Schilbert for providing her python script to assist RT-qPCR primer design.

732

#### 733 **Funding**

734 This work was supported by basic funding of the departments of Genetics and  
735 Genomics of Plants and Chemical Ecology provided by Bielefeld University/Faculty of  
736 Biology.

737

#### 738 **Author contributions**

739 RSt and BW conceived and designed the research. JFF, RSch and CM designed the  
740 metabolomics analyses. JFF, RSch, LMS and BP conducted experiments. BP  
741 generated, analyzed and deposited ONT data. RSch deposited the metabolic data in  
742 MetaboLights. JFF, RSt and RSch interpreted the data. JFF and RSch wrote the  
743 initial draft. RSt, CM and BW revised the manuscript. All authors read and approved  
744 the final manuscript.

745

#### 746 **Data availability statement**

747 ONT sequencing data were submitted to the *European Nucleotide Archive under*  
748 *study ID PRJEB36305: bglu1-1 (ERS4255859), bglu3-2 (ERS4255860) and bglu4-2*  
749 *(ERS4255861)*. Metabolic data (selected MS/MS spectra) will be made available  
750 upon publication of the paper in the MetaboLights repository (Haug *et al.*, 2020; Haug  
751 *et al.*, 2013) under the accession number MTBLS1965  
752 ([www.ebi.ac.uk/metabolights/MTBLS1965](http://www.ebi.ac.uk/metabolights/MTBLS1965)).

753 **References**

- 754 **Alonso JM, Stepanova AN, Leisse TJ, Kim CJ, Chen H, Shinn P, Stevenson DK,**  
755 **Zimmerman J, Barajas P, Cheuk R, Gadrinab C, Heller C, Jeske A, Koesema E,**  
756 **Meyers CC, Parker H, Prednis L, Ansari Y, Choy N, Deen H, Geralt M, Hazari N,**  
757 **Hom E, Karnes M, Mulholland C, Ndubaku R, Schmidt I, Guzman P, Aguilar-**  
758 **Henonin L, Schmid M, Weigel D, Carter DE, Marchand T, Risseeuw E, Brogden**  
759 **D, Zeko A, Crosby WL, Berry CC, Ecker JR.** 2003. Genome-wide insertional  
760 mutagenesis of *Arabidopsis thaliana*. *Science* **301**, 653-657.
- 761 **Alseekh S, Ofner I, Liu Z, Osorio S, Vallarino J, Last RL, Zamir D, Tohge T,**  
762 **Fernie AR.** 2020. Quantitative trait loci analysis of seed-specialized metabolites  
763 reveals seed-specific flavonols and differential regulation of glycoalkaloid content in  
764 tomato. *The Plant Journal* **103**, 2007-2024.
- 765 **Andersen ØM, Fossen T, Torskangerpoll K, Fossen A, Hauge U.** 2004.  
766 Anthocyanin from strawberry (*Fragaria ananassa*) with the novel aglycone, 5-  
767 carboxypyranopelargonidin. *Phytochemistry* **65**, 405-410.
- 768 **Appelhagen I, Nordholt N, Seidel T, Spelt K, Koes R, Quattrochio F, Sagasser**  
769 **M, Weisshaar B.** 2015. TRANSPARENT TESTA 13 is a tonoplast P<sub>3A</sub>-ATPase  
770 required for vacuolar deposition of proanthocyanidins in *Arabidopsis thaliana* seeds.  
771 *The Plant Journal* **82**, 840-849.
- 772 **Bolle C, Huet G, Kleinbölting N, Haberer G, Mayer K, Leister D, Weisshaar B.**  
773 2013. GABI-DUPLO: a collection of double mutants to overcome genetic redundancy  
774 in *Arabidopsis thaliana*. *The Plant Journal* **75**, 157-171.
- 775 **Cao Y-Y, Yang J-F, Liu T-Y, Su Z-F, Zhu F-Y, Chen M-X, Fan T, Ye N-H, Feng Z,**  
776 **Wang L-J, Hao G-F, Zhang J, Liu Y-G.** 2017. A phylogenetically informed  
777 comparison of GH1 hydrolases between *Arabidopsis* and rice response to stressors.  
778 *Frontiers in Plant Science* **8**, 350.

- 779 **Clough SJ, Bent AF**. 1998. Floral dip: a simplified method for *Agrobacterium*-  
780 mediated transformation of *Arabidopsis thaliana*. *The Plant Journal* **16**, 735-743.
- 781 **Dixon RA, Xie D-Y, Sharma SB**. 2005. Proanthocyanidins – a final frontier in  
782 flavonoid research? *New Phytologist* **165**, 9-28.
- 783 **Dunn KW, Kamocka MM, McDonald JH**. 2011. A practical guide to evaluating  
784 colocalization in biological microscopy. *American Journal of Physiology-Cell*  
785 *Physiology* **300**, C723-742.
- 786 **Falcone Ferreyra ML, Rius SP, Casati P**. 2012. Flavonoids: biosynthesis, biological  
787 functions, and biotechnological applications. *Frontiers in Plant Science* **3**, 222.
- 788 **Falginella L, Castellarin SD, Testolin R, Gambetta GA, Morgante M, Di Gaspero**  
789 **G**. 2010. Expansion and subfunctionalisation of flavonoid 3',5'-hydroxylases in the  
790 grapevine lineage. *BMC Genomics* **11**, 562.
- 791 **Fulcrand H, Benabdeljalil C, Rigaud J, Cheynier V, Moutounet M**. 1998. A new  
792 class of wine pigments generated by reaction between pyruvic acid and grape  
793 anthocyanins. *Phytochemistry* **47**, 1401-1407.
- 794 **Gachon CMM, Langlois-Meurinne M, Saindrenan P**. 2005. Plant secondary  
795 metabolism glycosyltransferases: the emerging functional analysis. *Trends in Plant*  
796 *Science* **10**, 542-549.
- 797 **Geng H, Wang M, Gong J, Xu Y, Ma S**. 2021. An *Arabidopsis* expression predictor  
798 enables inference of transcriptional regulators for gene modules. *The Plant Journal*  
799 **107**, 597-612.
- 800 **Gómez-Anduro G, Cenicerros-Ojeda EA, Casados-Vázquez LE, Bencivenni C,**  
801 **Sierra-Beltrán A, Murillo-Amador B, Tiessen A**. 2011. Genome-wide analysis of  
802 the beta-glucosidase gene family in maize (*Zea mays* L. var B73). *Plant Molecular*  
803 *Biology* **77**, 159-183.



804 **González-Manzano S, Pérez-Alonso JJ, Salinas-Moreno Y, Mateus N, Silva**  
805 **AMS, de Freitas V, Santos-Buelga C.** 2008. Flavanol–anthocyanin pigments in  
806 corn: NMR characterisation and presence in different purple corn varieties. *Journal of*  
807 *Food Composition and Analysis* **21**, 521-526.

808 **Grefen C, Donald N, Hashimoto K, Kudla J, Schumacher K, Blatt MR.** 2010. A  
809 ubiquitin-10 promoter-based vector set for fluorescent protein tagging facilitates  
810 temporal stability and native protein distribution in transient and stable expression  
811 studies. *The Plant Journal* **64**, 355-365.

812 **Haasen D, Köhler C, Neuhaus G, Merkle T.** 1999. Nuclear export of proteins in  
813 plants: AtXPO1 is the export receptor for leucine-rich nuclear export signals in  
814 *Arabidopsis thaliana*. *The Plant Journal* **20**, 695-705.

815 **Haug K, Cochrane K, Nainala VC, Williams M, Chang J, Jayaseelan KV,**  
816 **O'Donovan C.** 2020. MetaboLights: a resource evolving in response to the needs of  
817 its scientific community. *Nucleic Acids Research* **48**, D440-D444.

818 **Haug K, Salek RM, Conesa P, Hastings J, de Matos P, Rijnbeek M, Mahendraker**  
819 **T, Williams M, Neumann S, Rocca-Serra P, Maguire E, Gonzalez-Beltran A,**  
820 **Sansone SA, Griffin JL, Steinbeck C.** 2013. MetaboLights-an open-access general-  
821 purpose repository for metabolomics studies and associated meta-data. *Nucleic*  
822 *Acids Research* **41**, D781-D786.

823 **Hectors K, Van Oevelen S, Geuns J, Guisez Y, Jansen MAK, Prinsen E.** 2014.  
824 Dynamic changes in plant secondary metabolites during UV acclimation in  
825 *Arabidopsis thaliana*. *Physiologia Plantarum* **152**, 219-230.

826 **Ishihara H, Tohge T, Viehöver P, Fernie AR, Weisshaar B, Stracke R.** 2016.  
827 Natural variation in flavonol accumulation in *Arabidopsis* is determined by the flavonol  
828 glucosyltransferase BGLU6. *Journal of Experimental Botany* **67**, 1505-1517.

- 829 **Jackson R, Knisley D, McIntosh C, Pfeiffer P.** 2011. Predicting flavonoid UGT  
830 regioselectivity. *Advances in Bioinformatics* **2011**, 506583.
- 831 **Jakoby M, Wang H-Y, Reidt W, Weisshaar B, Bauer P.** 2004. *FRU (BHLH029)* is  
832 required for induction of iron mobilization genes in *Arabidopsis thaliana*. *FEBS*  
833 *Letters* **577**, 528-534.
- 834 **Jones P, Messner B, Nakajima J-I, Schäffner AR, Saito K.** 2003. UGT73C6 and  
835 UGT78D1, glycosyltransferases involved in flavonol glycoside biosynthesis in  
836 *Arabidopsis thaliana*. *Journal of Biological Chemistry* **278**, 43910-43918.
- 837 **Kachlicki P, Piasecka A, Stobiecki M, Marczak Ł.** 2016. Structural characterization  
838 of flavonoid glycoconjugates and their derivatives with mass spectrometric  
839 techniques. *Molecules* **21**, 1494.
- 840 **Kay R, Chan A, Daly M, McPherson J.** 1987. Duplication of CaMV 35S promoter  
841 sequences creates a strong enhancer for plant genes. *Science* **236**, 1299-1302.
- 842 **Kerhoas L, Aouak D, Cingöz A, Routaboul J-M, Lepiniec L, Einhorn J, Birlirakis**  
843 **N.** 2006. Structural characterization of the major flavonoid glycosides from  
844 *Arabidopsis thaliana* seeds. *Journal of Agricultural and Food Chemistry* **54**, 6603-  
845 6612.
- 846 **Kessler A, Kalske A.** 2018. Plant secondary metabolite diversity and species  
847 interactions. *Annual Review of Ecology, Evolution, and Systematics* **49**, 115-138.
- 848 **Kim S, Chen J, Cheng T, Gindulyte A, He J, He S, Li Q, Shoemaker BA,**  
849 **Thiessen PA, Yu B, Zaslavsky L, Zhang J, Bolton EE.** 2019. PubChem 2019  
850 update: improved access to chemical data. *Nucleic Acids Research* **47**, D1102-  
851 D1109.
- 852 **Kleinboelting N, Huet G, Appelhagen I, Viehoveer P, Li Y, Weisshaar B.** 2015.  
853 The structural features of thousands of T-DNA insertion sites are consistent with a

854 double-strand break repair-based insertion mechanism. *Molecular Plant* **8**, 1651-  
855 1664.

856 **Kleinboelting N, Huet G, Kloetgen A, Viehoveer P, Weisshaar B.** 2012. GABI-Kat  
857 SimpleSearch: new features of the *Arabidopsis thaliana* T-DNA mutant database.  
858 *Nucleic Acids Research* **40**, D1211-D1215.

859 **Klepikova AV, Kasianov AS, Gerasimov ES, Logacheva MD, Penin AA.** 2016. A  
860 high resolution map of the *Arabidopsis thaliana* developmental transcriptome based  
861 on RNA-seq profiling. *The Plant Journal* **88**, 1058-1070.

862 **Koncz C, Schell J.** 1986. The promoter of T<sub>L</sub>-DNA gene 5 controls the tissue-  
863 specific expression of chimaeric genes carried by a novel type of *Agrobacterium*  
864 binary vector. *Molecular Genetics and Genomics* **204**, 383-396.

865 **Le Roy J, Huss B, Creach A, Hawkins S, Neutelings G.** 2016. Glycosylation is a  
866 major regulator of phenylpropanoid availability and biological activity in plants.  
867 *Frontiers in Plant Science* **7**, 735.

868 **Lee JH, Kang NS, Shin S-O, Shin S-H, Lim S-G, Suh D-Y, Baek I-Y, Park K-Y, Ha**  
869 **TJ.** 2009. Characterisation of anthocyanins in the black soybean (*Glycine max* L.) by  
870 HPLC-DAD-ESI/MS analysis. *Food Chemistry* **112**, 226-231.

871 **Lepiniec L, Debeaujon I, Routaboul J-M, Baudry A, Pourcel L, Nesi N, Caboche**  
872 **M.** 2006. Genetics and biochemistry of seed flavonoids. *Annual Review of Plant*  
873 *Biology* **57**, 405-430.

874 **Livak KJ, Schmittgen TD.** 2001. Analysis of relative gene expression data using  
875 real-time quantitative PCR and the 2<sup>-ΔΔCT</sup> method. *Methods* **25**, 402-408.

876 **Luang S, Cho J-I, Mahong B, Opassiri R, Akiyama T, Phasai K, Komvongsa J,**  
877 **Sasaki N, Hua Y-L, Matsuba Y, Ozeki Y, Jeon J-S, Cairns JRK.** 2013. Rice  
878 Os9BGlu31 is a transglucosidase with the capacity to equilibrate phenylpropanoid,

879 flavonoid, and phytohormone glycoconjugates. *Journal of Biological Chemistry* **288**,  
880 10111-10123.

881 **Matsuba Y, Sasaki N, Tera M, Okamura M, Abe Y, Okamoto E, Nakamura H,**  
882 **Funabashi H, Takatsu M, Saito M, Matsuoka H, Nagasawa K, Ozeki Y.** 2010. A  
883 novel glucosylation reaction on anthocyanins catalyzed by acyl-glucose-dependent  
884 glucosyltransferase in the petals of carnation and delphinium. *The Plant Cell* **22**,  
885 3374-3389.

886 **Meißner D, Albert A, Böttcher C, Strack D, Milkowski C.** 2008. The role of UDP-  
887 glucose:hydroxycinnamate glucosyltransferases in phenylpropanoid metabolism and  
888 the response to UV-B radiation in *Arabidopsis thaliana*. *Planta* **228**, 663-674.

889 **Mierziak J, Kostyn K, Kulma A.** 2014. Flavonoids as important molecules of plant  
890 interactions with the environment. *Molecules* **19**, 16240-16265.

891 **Miyahara T, Matsuba Y, Ozeki Y, Sasaki N.** 2011. Identification of genes in  
892 *Arabidopsis thaliana* with homology to a novel acyl-glucose dependent  
893 glucosyltransferase of carnations. *Plant Biotechnology* **28**, 311-315.

894 **Miyahara T, Sakiyama R, Ozeki Y, Sasaki N.** 2013. Acyl-glucose-dependent  
895 glucosyltransferase catalyzes the final step of anthocyanin formation in *Arabidopsis*.  
896 *Journal of Plant Physiology* **170**, 619-624.

897 **Miyahara T, Takahashi M, Ozeki Y, Sasaki N.** 2012. Isolation of an acyl-glucose-  
898 dependent anthocyanin 7-O-glucosyltransferase from the monocot *Agapanthus*  
899 *africanus*. *Journal of Plant Physiology* **169**, 1321-1326.

900 **Nagaya S, Kato K, Ninomiya Y, Horie R, Sekine M, Yoshida K, Shinmyo A.** 2005.  
901 Expression of randomly integrated single complete copy transgenes does not vary in  
902 *Arabidopsis thaliana*. *Plant and Cell Physiology* **46**, 438-444.

- 903 **Nave F, Teixeira N, Mateus N, de Freitas V.** 2010. Hemisynthesis and structural  
904 characterization of flavanol-(4,8)-vitisins by mass spectrometry. *Rapid*  
905 *Communications in Mass Spectrometry* **24**, 1964-1970.
- 906 **Nesi N, Jond C, Debeaujon I, Caboche M, Lepiniec L.** 2001. The *Arabidopsis TT2*  
907 gene encodes an R2R3 MYB domain protein that acts as a key determinant for  
908 proanthocyanidin accumulation in developing seed. *The Plant Cell* **13**, 2099-2114.
- 909 **Noguchi A, Horikawa M, Fukui Y, Fukuchi-Mizutani M, Iuchi-Okada A, Ishiguro**  
910 **M, Kiso Y, Nakayama T, Ono E.** 2009. Local differentiation of sugar donor specificity  
911 of flavonoid glycosyltransferase in Lamiales. *The Plant Cell* **21**, 1556-1572.
- 912 **O'Malley RC, Ecker JR.** 2010. Linking genotype to phenotype using the *Arabidopsis*  
913 unimutant collection. *The Plant Journal* **61**, 928-940.
- 914 **Plaza M, Pozzo T, Liu J, Gulshan Ara KZ, Turner C, Nordberg Karlsson E.** 2014.  
915 Substituent effects on in vitro antioxidizing properties, stability, and solubility in  
916 flavonoids. *Journal of Agricultural and Food Chemistry* **62**, 3321-3333.
- 917 **Pucker B, Kleinbölting N, Weisshaar B.** 2021. Large scale genomic  
918 rearrangements in selected *Arabidopsis thaliana* T-DNA lines are caused by T-DNA  
919 insertion mutagenesis. *BMC Genomics* **22**, 599.
- 920 **Quiel JA, Bender J.** 2003. Glucose conjugation of anthranilate by the *Arabidopsis*  
921 UGT74F2 glucosyltransferase is required for tryptophan mutant blue fluorescence.  
922 *Journal of Biological Chemistry* **278**, 6275-6281.
- 923 **Remy S, Fulcrand H, Labarbe B, Cheynier V, Moutounet M.** 2000. First  
924 confirmation in red wine of products resulting from direct anthocyanin-tannin  
925 reactions. *Journal of the Science of Food and Agriculture* **80**, 745-751.
- 926 **Rentzsch M, Schwarz M, Winterhalter P.** 2007. Pyranoanthocyanins – an overview  
927 on structures, occurrence, and pathways of formation. *Trends in Food Science &*  
928 *Technology* **18**, 526-534.

929 **Routaboul J-M, Dubos C, Beck G, Marquis C, Bidzinski P, Loudet O, Lepiniec L.**  
930 2012. Metabolite profiling and quantitative genetics of natural variation for flavonoids  
931 in *Arabidopsis*. *Journal of Experimental Botany* **63**, 3749-3764.

932 **Ruttkies C, Schymanski EL, Wolf S, Hollender J, Neumann S.** 2016. MetFrag  
933 relaunched: incorporating strategies beyond *in silico* fragmentation. *Journal of*  
934 *Cheminformatics* **8**, 3.

935 **Saito K, Yonekura-Sakakibara K, Nakabayashi R, Higashi Y, Yamazaki M, Tohge**  
936 **T, Fernie AR.** 2013. The flavonoid biosynthetic pathway in *Arabidopsis*: Structural  
937 and genetic diversity. *Plant Physiology and Biochemistry* **72**, 21-34.

938 **Sánchez-Illárduya MB, Sánchez-Fernández C, Vilorio-Bernal M, López-Márquez**  
939 **DM, Berrueta LA, Gallo B, Vicente F.** 2012. Mass spectrometry fragmentation  
940 pattern of coloured flavanol-anthocyanin and anthocyanin-flavanol derivatives in  
941 aged red wines of Rioja. *Australian Journal of Grape and Wine Research* **18**, 203-  
942 214.

943 **Sasaki N, Nishizaki Y, Ozeki Y, Miyahara T.** 2014. The role of acyl-glucose in  
944 anthocyanin modifications. *Molecules* **19**, 18747-18766.

945 **Schindelin J, Arganda-Carreras I, Frise E, Kaynig V, Longair M, Pietzsch T,**  
946 **Preibisch S, Rueden C, Saalfeld S, Schmid B, Tinevez J-Y, White DJ,**  
947 **Hartenstein V, Eliceiri K, Tomancak P, Cardona A.** 2012. Fiji: an open-source  
948 platform for biological-image analysis. *Nature Methods* **9**, 676-682.

949 **Schrieber K, Schweiger R, Kröner L, Müller C.** 2019. Inbreeding diminishes  
950 herbivore-induced metabolic responses in native and invasive plant populations.  
951 *Journal of Ecology* **107**, 923-936.

952 **Stobiecki M, Skiryicz A, Kerhoas L, Kachlicki P, Muth D, Einhorn J, Mueller-**  
953 **Roeber B.** 2006. Profiling of phenolic glycosidic conjugates in leaves of *Arabidopsis*  
954 *thaliana* using LC/MS. *Metabolomics* **2**, 197-219.

- 955 **Sun J, Lin L-Z, Chen P.** 2012. Study of the mass spectrometric behaviors of  
956 anthocyanins in negative ionization mode and its applications for characterization of  
957 anthocyanins and non-anthocyanin polyphenols. *Rapid Communications in Mass*  
958 *Spectrometry* **26**, 1123-1133.
- 959 **Suzuki Y, Kawazu T, Koyama H.** 2004. RNA isolation from siliques, dry seeds, and  
960 other tissues of *Arabidopsis thaliana*. *BioTechniques* **37**, 542-544.
- 961 **Tanaka Y, Sasaki N, Ohmiya A.** 2008. Biosynthesis of plant pigments:  
962 anthocyanins, betalains and carotenoids. *The Plant Journal* **54**, 733-749.
- 963 **Tohge T, Nishiyama Y, Hirai MY, Yano M, Nakajima J-I, Awazuhara M, Inoue E,**  
964 **Takahashi H, Goodenowe DB, Kitayama M, Noji M, Yamazaki M, Saito K.** 2005.  
965 Functional genomics by integrated analysis of metabolome and transcriptome of  
966 *Arabidopsis* plants over-expressing an MYB transcription factor. *The Plant Journal*  
967 **42**, 218-235.
- 968 **Tohge T, Watanabe M, Hoefgen R, Fernie AR.** 2013. The evolution of  
969 phenylpropanoid metabolism in the green lineage. *Critical Reviews in Biochemistry*  
970 *and Molecular Biology* **48**, 123-152.
- 971 **Ülker B, Peiter E, Dixon DP, Moffat C, Capper R, Bouché N, Edwards R, Sanders**  
972 **D, Knight H, Knight MR.** 2008. Getting the most out of publicly available T-DNA  
973 insertion lines. *The Plant Journal*. **56**, 665-677.
- 974 **Vandesompele J, De Preter K, Pattyn F, Poppe B, Van Roy N, De Paepe A,**  
975 **Speleman F.** 2002. Accurate normalization of real-time quantitative RT-PCR data by  
976 geometric averaging of multiple internal control genes. *Genome Biology* **3**,  
977 research0034.1.
- 978 **Vogt T, Jones P.** 2000. Glycosyltransferases in plant natural product synthesis:  
979 characterization of a supergene family. *Trends in Plant Science* **5**, 380-386.

- 980 **von Arnim AG, Deng X-W, Stacey MG**. 1998. Cloning vectors for the expression of  
981 green fluorescent protein fusion proteins in transgenic plants. *Gene* **221**, 35-43.
- 982 **Wang S, Alseekh S, Fernie AR, Luo J**. 2019. The structure and function of major  
983 plant metabolite modifications. *Molecular Plant* **12**, 899-919.
- 984 **Wen W, Alseekh S, Fernie AR**. 2020. Conservation and diversification of flavonoid  
985 metabolism in the plant kingdom. *Current Opinion in Plant Biology* **55**, 100-108.
- 986 **Wu S, Tohge T, Cuadros-Inostroza Á, Tong H, Tenenboim H, Kooke R, Méret M,**  
987 **Keurentjes JB, Nikoloski Z, Fernie AR, Willmitzer L, Brotman Y**. 2018. Mapping  
988 the *Arabidopsis* metabolic landscape by untargeted metabolomics at different  
989 environmental conditions. *Molecular Plant* **11**, 118-134.
- 990 **Xu Y-L, Li L, Gage DA, Zeevaart JAD**. 1999. Feedback regulation of *GA5*  
991 expression and metabolic engineering of gibberellin levels in *Arabidopsis*. *The Plant*  
992 *Cell* **11**, 927-935.
- 993 **Xu Z, Escamilla-Treviño LL, Zeng L, Lalgondar M, Bevan DR, Winkel BSJ,**  
994 **Mohamed A, Cheng C-L, Shih MC, Poulton JE, Esen A**. 2004. Functional genomic  
995 analysis of *Arabidopsis thaliana* glycoside hydrolase family 1. *Plant Molecular Biology*  
996 **55**, 343-367.



## 997 Figure legends

998 **Fig. 1.** Characterization of *A. thaliana bglu* T-DNA insertion mutants and  
999 *2x35S::BGLU* overexpression lines for *BGLU1*, *BGLU3* and *BGLU4*. (A) *bglu* T-DNA  
1000 insertion alleles with boxes indicating coding exons of the wild type (wt) allele  
1001 structure, lines between the boxes indicating introns and triangles marking the  
1002 positions of T-DNA insertions. T-DNA insertion boundaries are shown with the  
1003 genomic sequences given in bold (introns in lowercase, exons in uppercase).  
1004 Sequences that originate from the insertion event and do not match either genomic  
1005 *BGLU* or T-DNA sequences are not shown here (for them, see Supplementary Table  
1006 S2). (B) Differential *BGLU* gene expression of the intact transcripts of *BGLU1*,  
1007 *BGLU3* and *BGLU4* in the *BGLU* expression variants, relative to the wt. Transcript  
1008 levels were measured by RT-qPCR in rosette leaves (*BGLU1*), dry mature seeds  
1009 (*BGLU3*) and 24 h water-soaked mature seeds (*BGLU4*), respectively. Data  
1010 presented are from three biological replicates with three technical replicates each;  
1011 error bars indicate the asymmetrically distributed cumulative standard error. The y-  
1012 axis is compressed between 70 and 145.

1013 **Fig. 2.** Main candidate product and substrate metabolic features of *A. thaliana*  
1014 *BGLU1*, *BGLU3* and *BGLU4*. Feature intensities in rosette leaves (*BGLU1*), dry  
1015 mature seeds (*BGLU3*) and 24 h water-soaked mature seeds (*BGLU4*), respectively,  
1016 are given as relative feature areas, i.e., peak areas divided by the peak area of the  
1017 internal standard and by the dry weight of the samples. The areas of the different  
1018 features are not directly comparable, as different spectra rates were used. Peaks of  
1019 *bglu* mutant samples are indicated by red triangles, those of wt samples by green  
1020 circles and those of *2x35S::BGLU* samples by blue squares. Vertical solid lines  
1021 separate the candidate features belonging to *BGLU1*, *BGLU3* and *BGLU4*; therein,  
1022 candidate products (left) and substrates (right, feature names on gray background)  
1023 are separated by vertical dashed lines and features within these groups by vertical  
1024 dotted lines. Fold changes (FCs, in bold if  $\geq 1.5$  or  $\leq 0.67$ ) were calculated as the  
1025 mean peak areas of the *BGLU* expression variants divided by the mean peak areas  
1026 of the wt; n = 4 biological replicates.

1027 **Fig. 3.** Candidate product of *BGLU1* of *A. thaliana*. While (A) shows the MS/MS  
1028 spectrum of the candidate product feature in the ESI<sup>+</sup> mode, (B) shows the  
1029 fragmentation of the corresponding ion found in ESI<sup>-</sup> mode. The assumed ion types  
1030 are given at the corresponding *m/z* values. Precursor ions are indicated by diamonds.  
1031 (C) Assumed structure of the proposed metabolite and possible fragmentation  
1032 pattern. All glycosyl groups are assumed to be O-bound. CE, collision energy; Hex,  
1033 hexosyl; NL, neutral loss; Rha, rhamnosyl.

1034 **Fig. 4.** Main candidate product and substrates of *BGLU3* of *A. thaliana*. MS/MS  
1035 spectra (ESI<sup>+</sup> mode) of (A) candidate product feature with an *m/z* value of 866.4164  
1036 at a retention time (RT) of 11.75 min, (B) candidate substrate feature with an *m/z*  
1037 value of 704.3635 at 13.11 min, (C) candidate substrate feature with an *m/z* value of  
1038 781.3270 at 15.38 min. Precursor ions are indicated by diamonds. CE, collision  
1039 energy; NL, neutral loss.

1040 **Fig. 5.** Candidate product of *BGLU3* of *A. thaliana*. While (A) shows the MS/MS  
1041 spectrum of the candidate product feature in the ESI<sup>+</sup> mode, (B) shows the  
1042 fragmentation of the corresponding ion found in ESI<sup>-</sup> mode. The assumed ion types  
1043 are given at the corresponding *m/z* values. Precursor ions are indicated by diamonds.

1044 (C) Assumed structure of the proposed metabolite and possible fragmentation  
1045 pattern. All glycosyl groups are assumed to be O-bound. CE, collision energy; Hex,  
1046 hexosyl; NL, neutral loss; Rha, rhamnosyl.

1047 **Fig. 6.** Candidate product of BGLU4 of *A. thaliana*. While (A) shows the MS/MS  
1048 spectrum of the candidate product feature in the ESI<sup>+</sup> mode, (B) shows the  
1049 fragmentation of the corresponding ion found in ESI<sup>-</sup> mode. The assumed ion types  
1050 are given at the corresponding *m/z* values. Precursor ions are indicated by diamonds.  
1051 (C) Assumed structure of the proposed metabolite and possible fragmentation  
1052 pattern. All glycosyl groups are assumed to be O-bound. CE, collision energy; Hex,  
1053 hexosyl; NL, neutral loss; Rha, rhamnosyl.

1054  
1055 **Fig. 7.** Subcellular localization of BGLU1, BGLU3 and BGLU4. Pictures show  
1056 transient accumulation of BGLU-RFP fusion proteins in BY2 protoplasts. The second  
1057 and third columns show co-localization with GFP (nucleus and cytoplasm) and TT13-  
1058 GFP (vacuole), respectively. Co-localizations with positive signals for GFP and RFP  
1059 in the merged images are visualized in white. Scale bars: 10  $\mu$ m.

1060 **Figures**

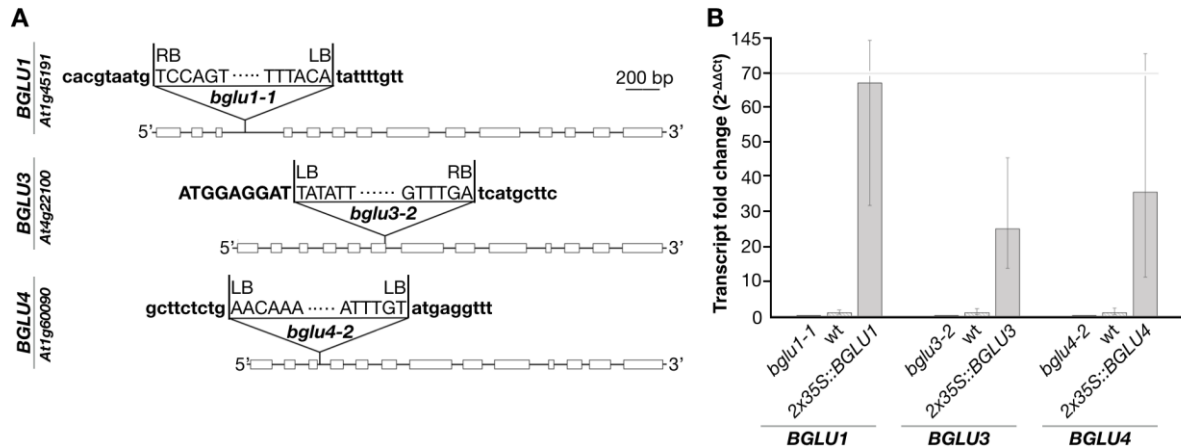

1061

1062 **Fig. 1.** Characterization of *A. thaliana bglu* T-DNA insertion mutants and  
1063 *2x35S::BGLU* overexpression lines for *BGLU1*, *BGLU3* and *BGLU4*. (A) *bglu* T-DNA  
1064 insertion alleles with boxes indicating coding exons of the wild type (wt) allele  
1065 structure, lines between the boxes indicating introns and triangles marking the  
1066 positions of T-DNA insertions. T-DNA insertion boundaries are shown with the  
1067 genomic sequences given in bold (introns in lowercase, exons in uppercase).  
1068 Sequences that originate from the insertion event and do not match either genomic  
1069 *BGLU* or T-DNA sequences are not shown here (for them, see Supplementary Table  
1070 S2). (B) Differential *BGLU* gene expression of the intact transcripts of *BGLU1*,  
1071 *BGLU3* and *BGLU4* in the *BGLU* expression variants, relative to the wt. Transcript  
1072 levels were measured by RT-qPCR in rosette leaves (*BGLU1*), dry mature seeds  
1073 (*BGLU3*) and 24 h water-soaked mature seeds (*BGLU4*), respectively. Data  
1074 presented are from three biological replicates with three technical replicates each;  
1075 error bars indicate the asymmetrically distributed cumulative standard error. The y-  
1076 axis is compressed between 70 and 145.

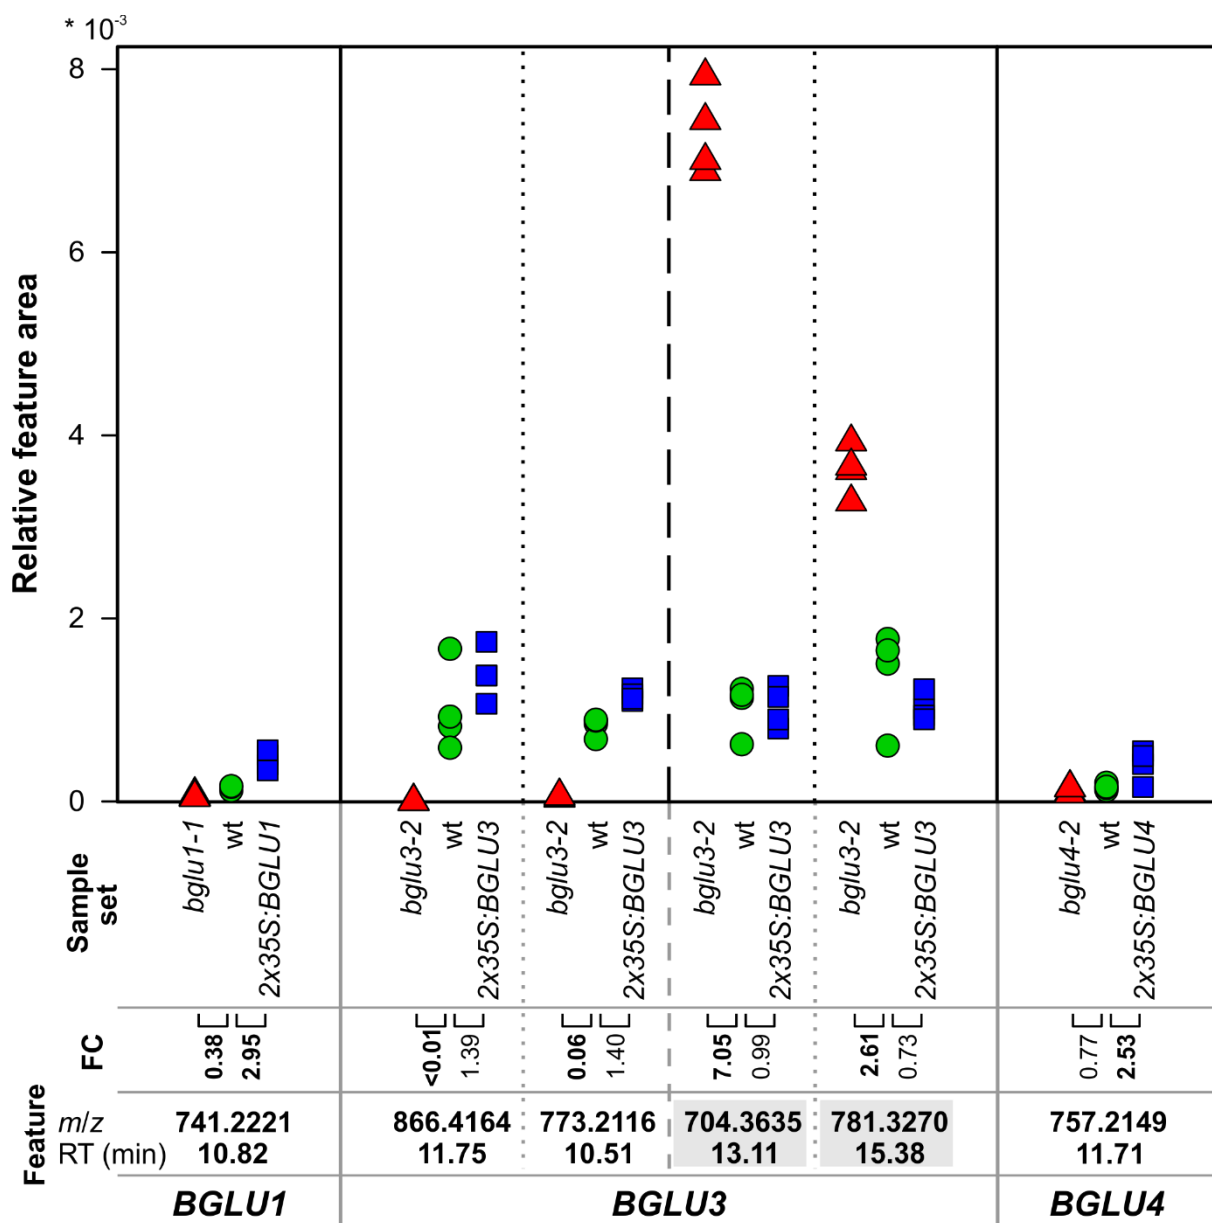

1077

1078 **Fig. 2.** Main candidate product and substrate metabolic features of *A. thaliana*  
 1079 *BGLU1*, *BGLU3* and *BGLU4*. Feature intensities in rosette leaves (*BGLU1*), dry  
 1080 mature seeds (*BGLU3*) and 24 h water-soaked mature seeds (*BGLU4*), respectively,  
 1081 are given as relative feature areas, i.e., peak areas divided by the peak area of the  
 1082 internal standard and by the dry weight of the samples. The areas of the different  
 1083 features are not directly comparable, as different spectra rates were used. Peaks of  
 1084 *bglu* mutant samples are indicated by red triangles, those of wt samples by green  
 1085 circles and those of 2x35S::*BGLU* samples by blue squares. Vertical solid lines  
 1086 separate the candidate features belonging to *BGLU1*, *BGLU3* and *BGLU4*; therein,  
 1087 candidate products (left) and substrates (right, feature names on gray background)  
 1088 are separated by vertical dashed lines and features within these groups by vertical  
 1089 dotted lines. Fold changes (FCs, in bold if  $\geq 1.5$  or  $\leq 0.67$ ) were calculated as the  
 1090 mean peak areas of the *BGLU* expression variants divided by the mean peak areas  
 1091 of the wt; n = 4 biological replicates.

## BGLU1

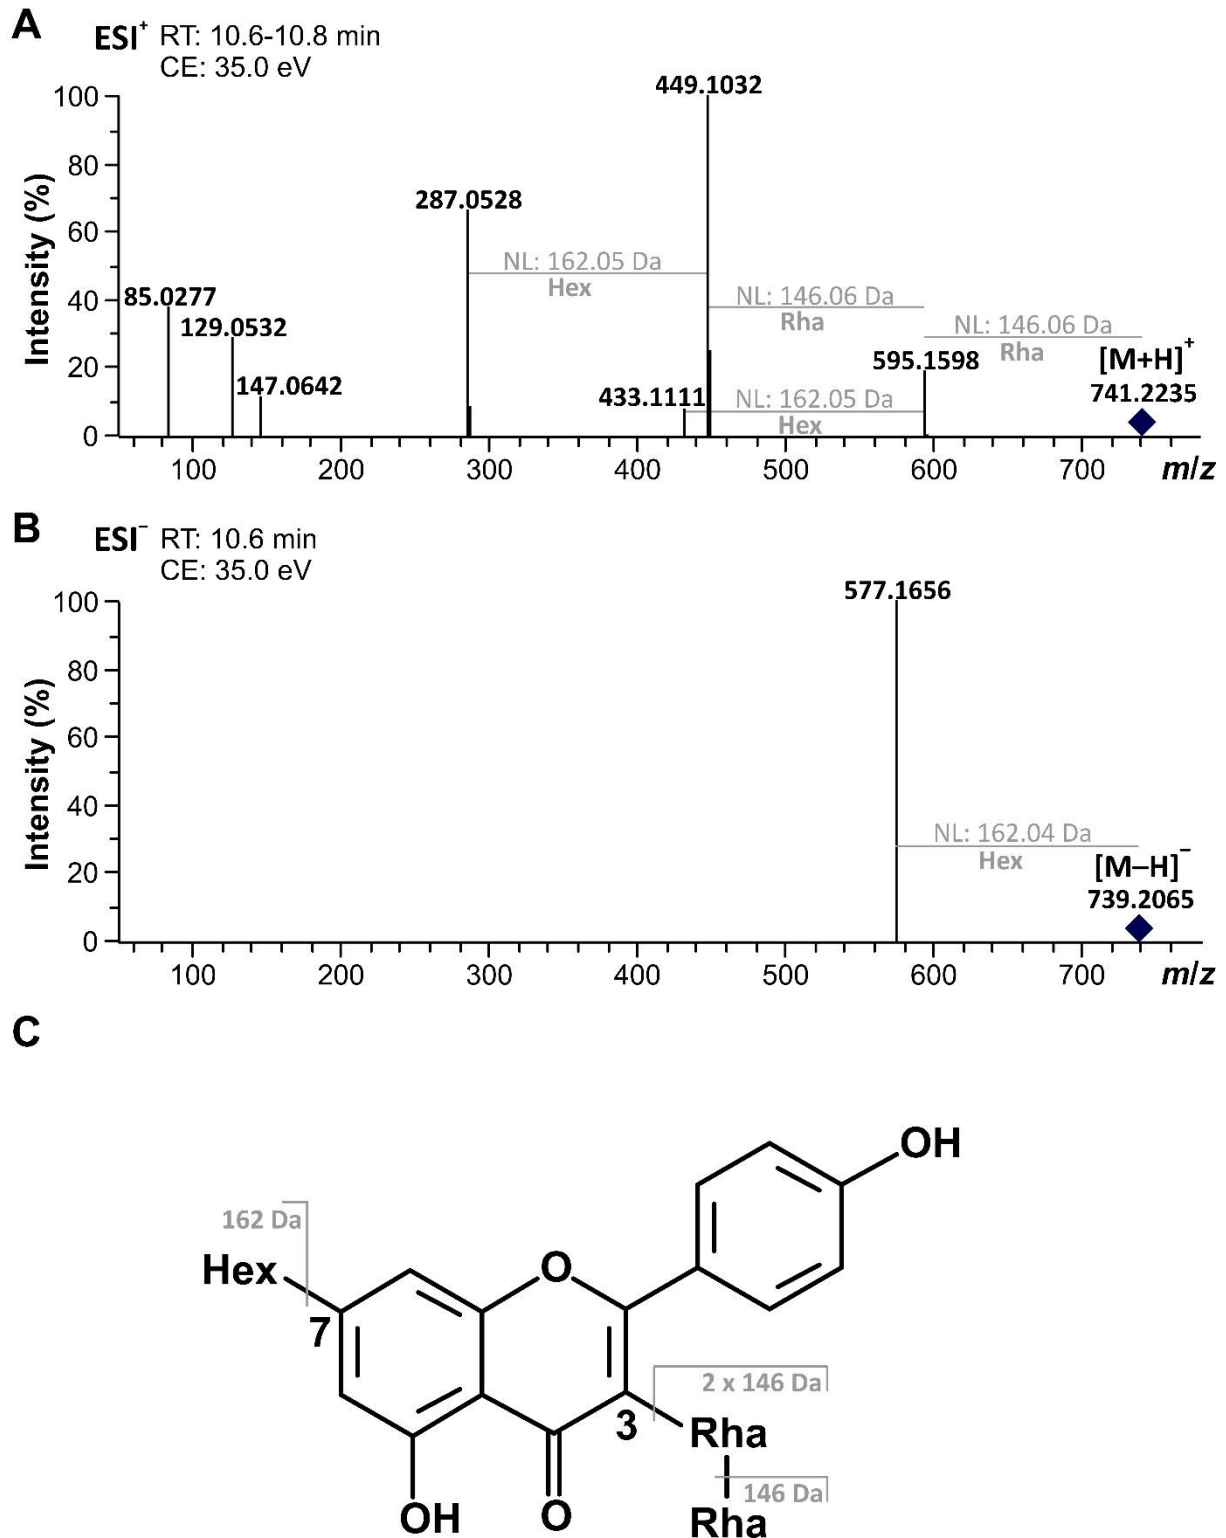

**Fig. 3.** Candidate product of BGLU1 of *A. thaliana*. While (A) shows the MS/MS spectrum of the candidate product feature in the ESI<sup>+</sup> mode, (B) shows the fragmentation of the corresponding ion found in ESI<sup>-</sup> mode. The assumed ion types are given at the corresponding *m/z* values. Precursor ions are indicated by diamonds. (C) Assumed structure of the proposed metabolite and possible fragmentation

1098 pattern. All glycosyl groups are assumed to be O-bound. CE, collision energy; Hex,  
1099 hexosyl; NL, neutral loss; Rha, rhamnosyl.

## BGLU3

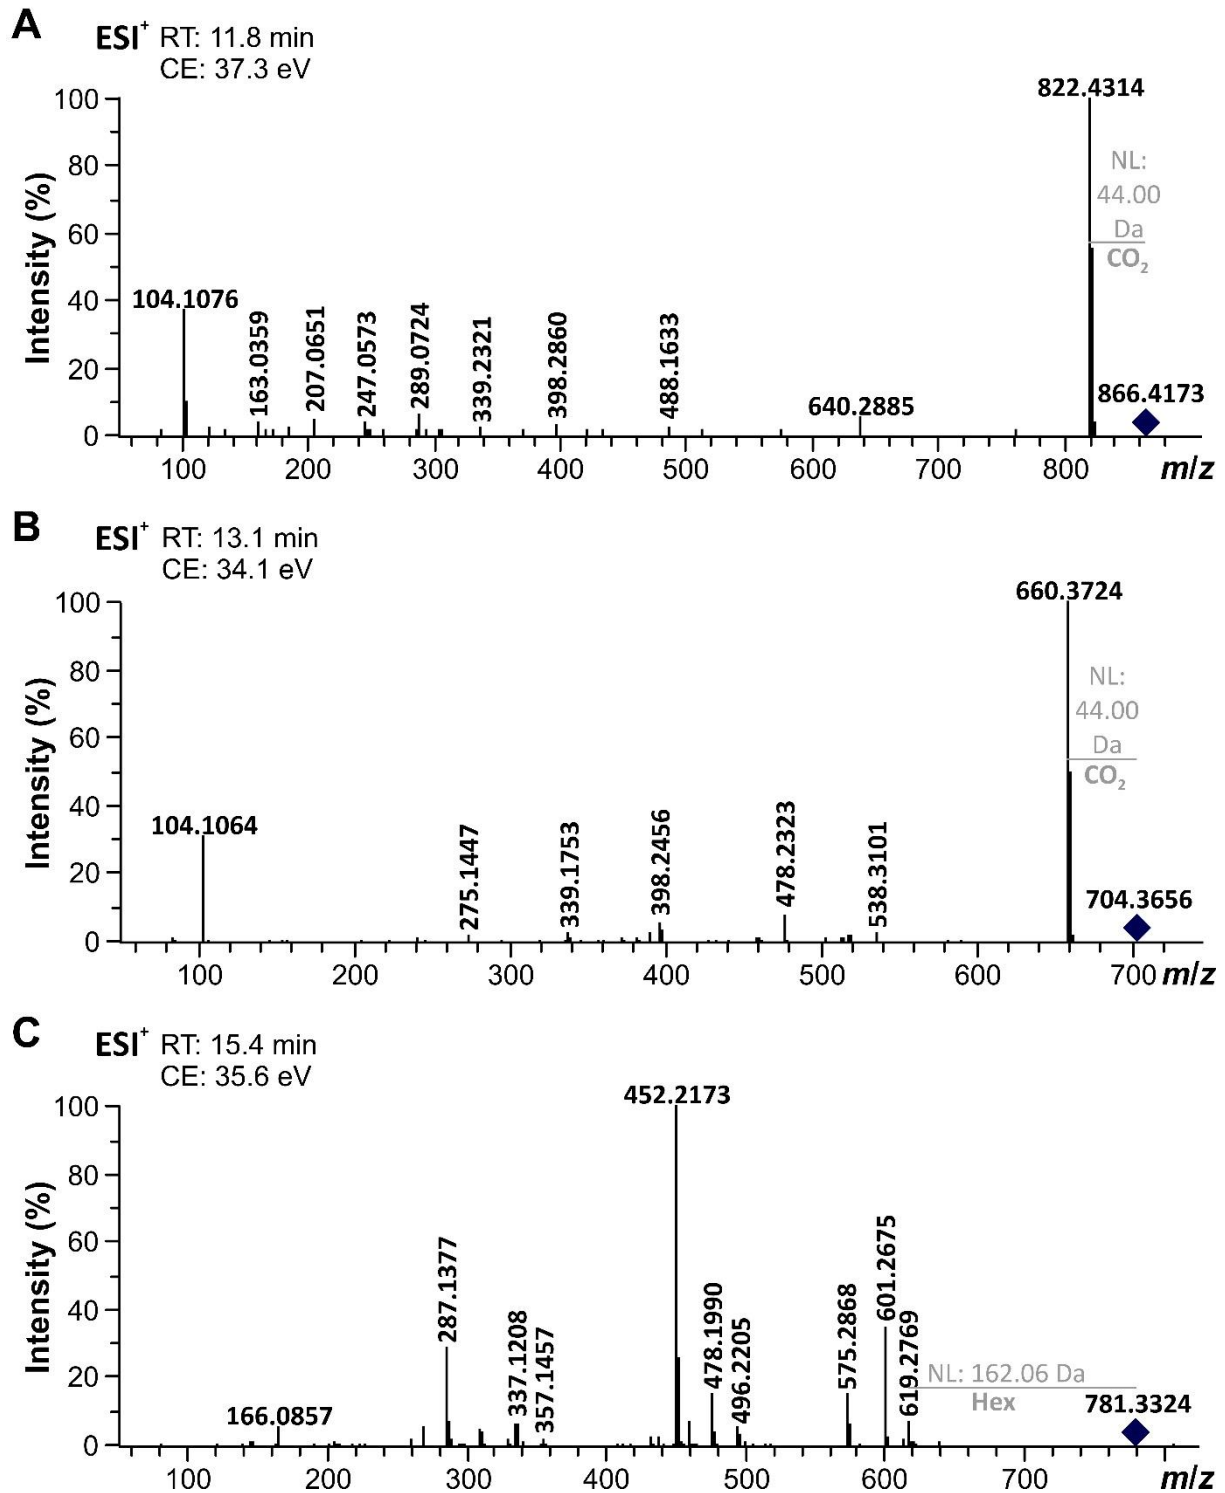

1100

1101 **Fig. 4.** Main candidate product and substrates of BGLU3 of *A. thaliana*. MS/MS  
1102 spectra (ESI<sup>+</sup> mode) of (A) candidate product feature with an  $m/z$  value of 866.4164  
1103 at a retention time (RT) of 11.75 min, (B) candidate substrate feature with an  $m/z$   
1104 value of 704.3635 at 13.11 min, (C) candidate substrate feature with an  $m/z$  value of  
1105 781.3270 at 15.38 min. Precursor ions are indicated by diamonds. CE, collision  
1106 energy; NL, neutral loss.

## BGLU3

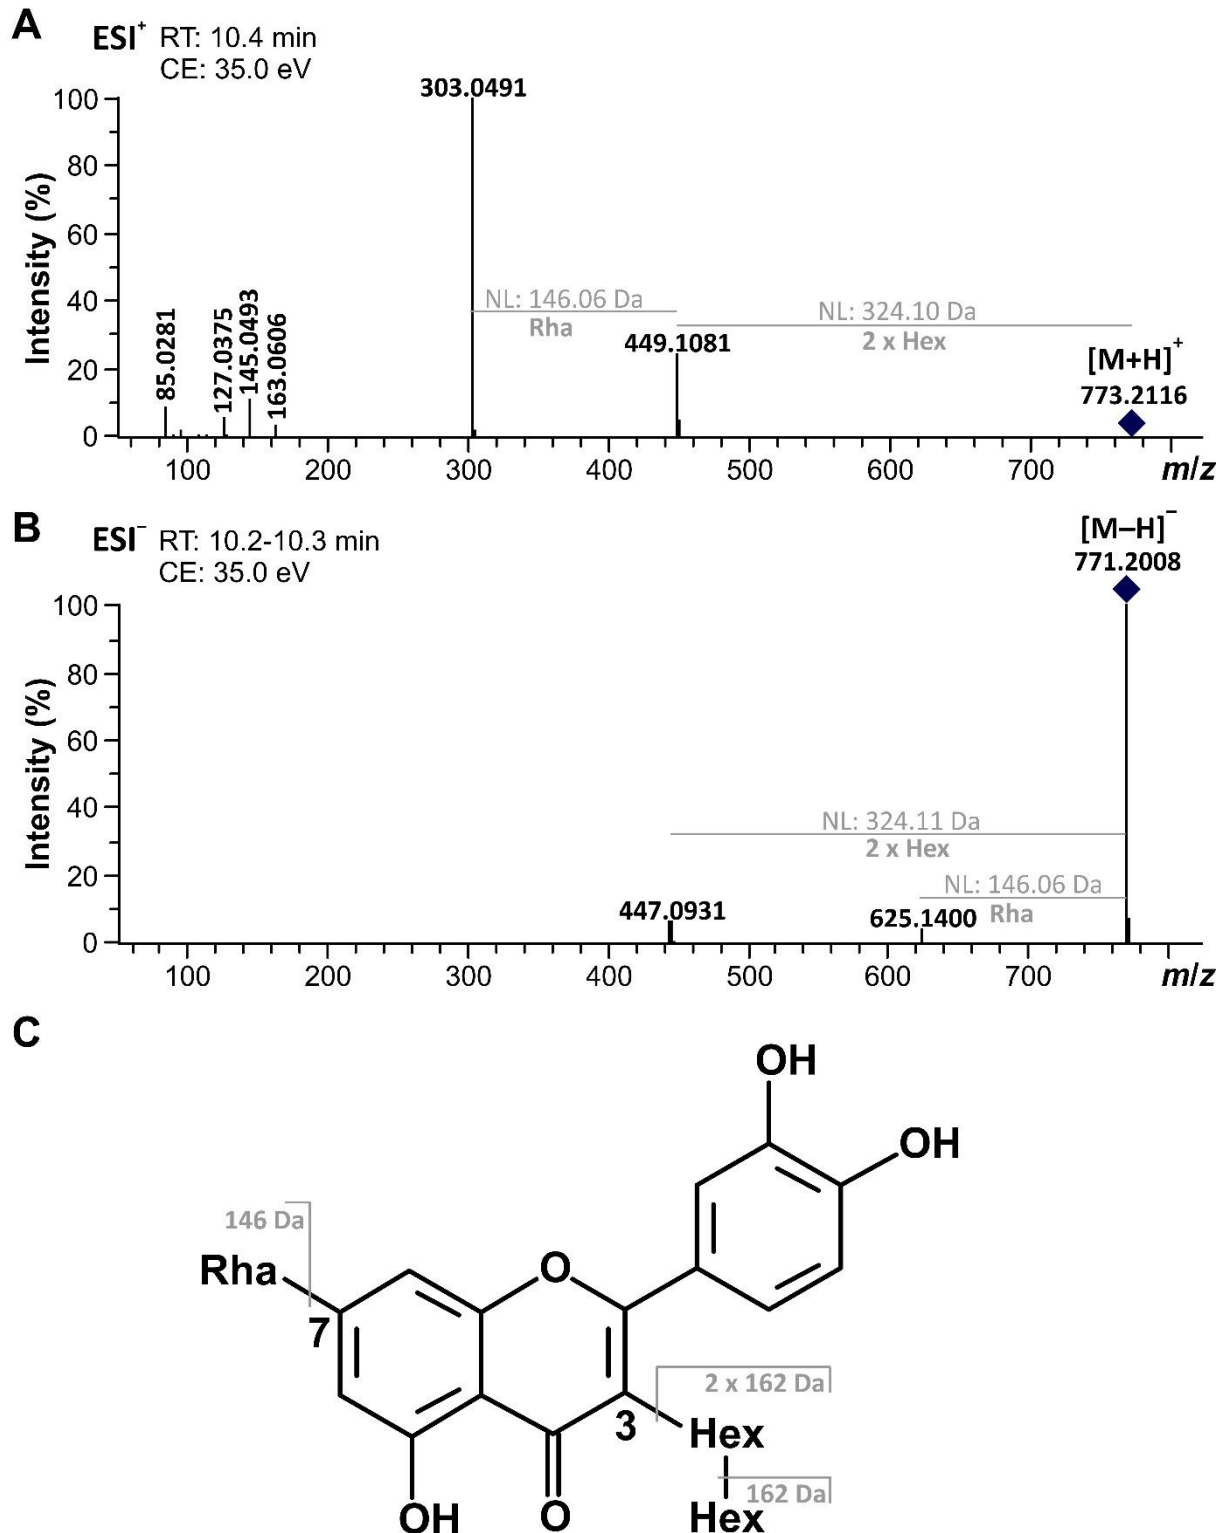

1107

1108 **Fig. 5.** Candidate product of BGLU3 of *A. thaliana*. While (A) shows the MS/MS  
1109 spectrum of the candidate product feature in the ESI<sup>+</sup> mode, (B) shows the  
1110 fragmentation of the corresponding ion found in ESI<sup>-</sup> mode. The assumed ion types  
1111 are given at the corresponding  $m/z$  values. Precursor ions are indicated by diamonds.  
1112 (C) Assumed structure of the proposed metabolite and possible fragmentation



1113 pattern. All glycosyl groups are assumed to be O-bound. CE, collision energy; Hex,  
1114 hexosyl; NL, neutral loss; Rha, rhamnosyl.

## BGLU4

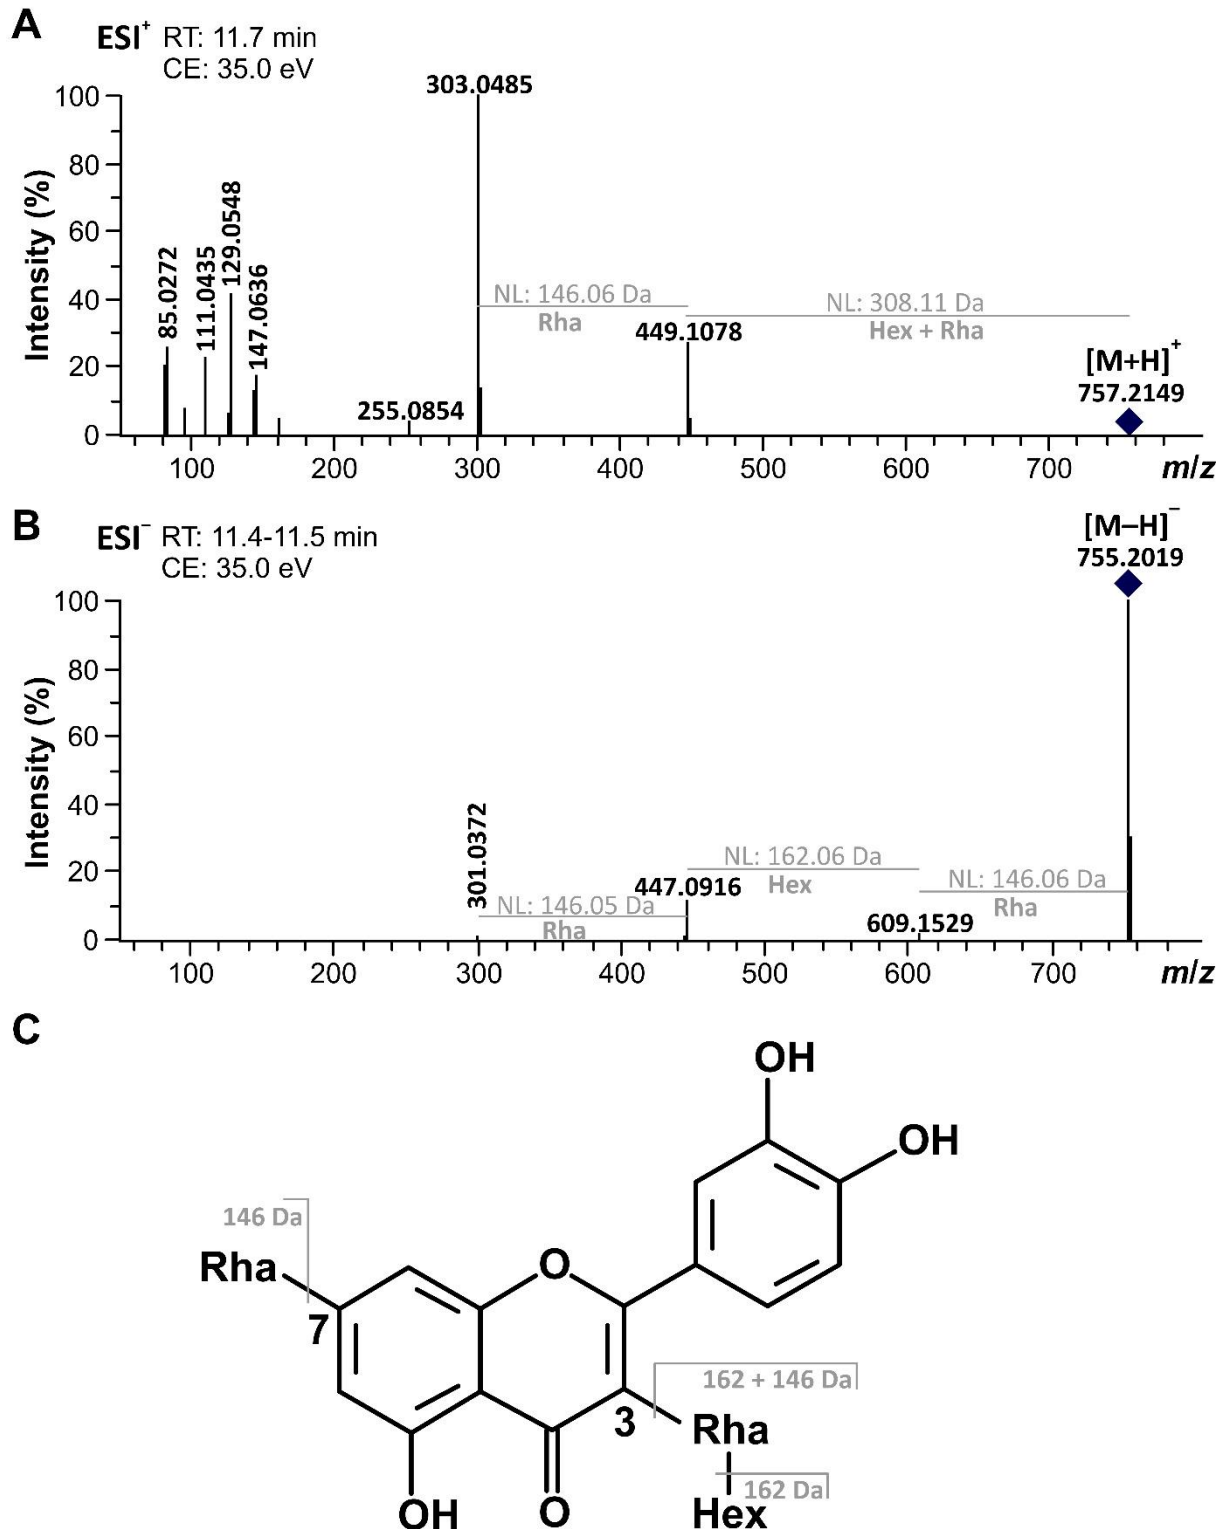

1121 pattern. All glycosyl groups are assumed to be O-bound. CE, collision energy; Hex,  
1122 hexosyl; NL, neutral loss; Rha, rhamnosyl.

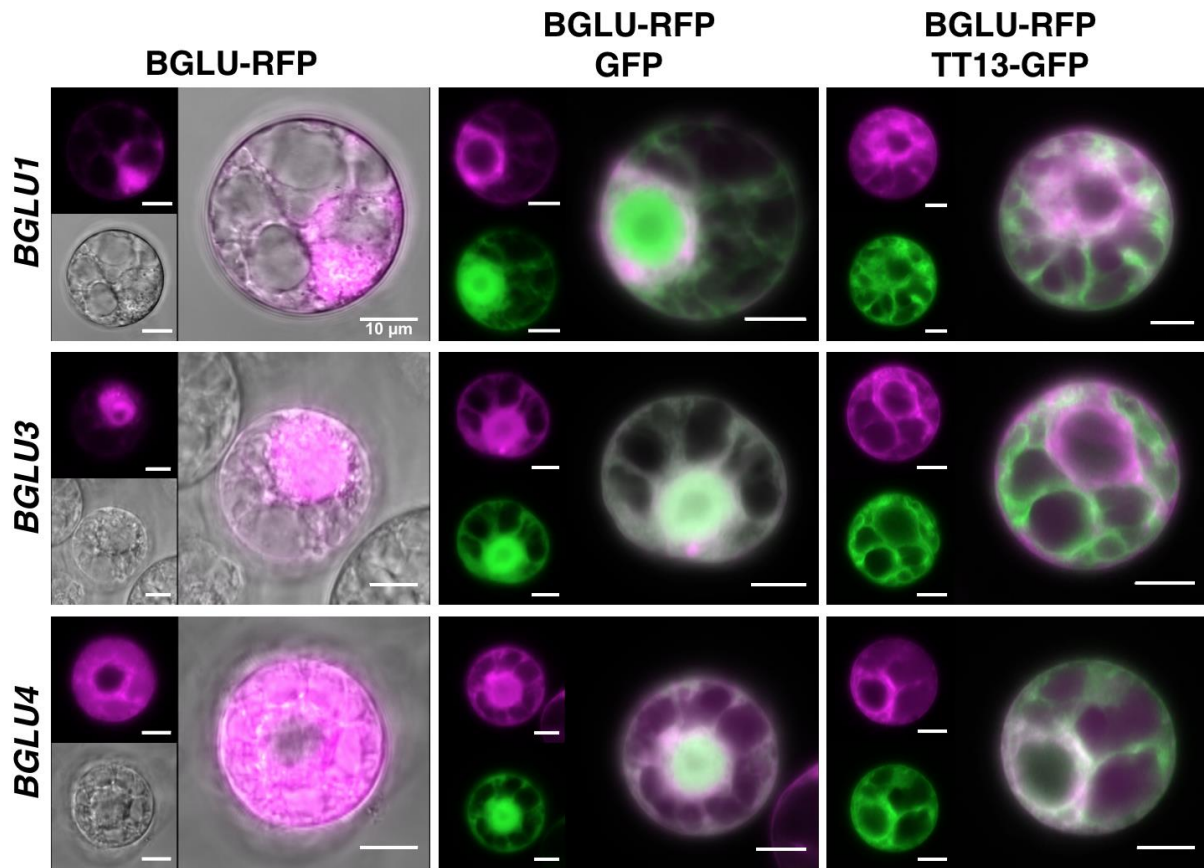

1123

1124 **Fig. 7.** Subcellular localization of BGLU1, BGLU3 and BGLU4. Pictures show  
1125 transient accumulation of BGLU-RFP fusion proteins in BY2 protoplasts. The second  
1126 and third columns show co-localization with GFP (nucleus and cytoplasm) and TT13-  
1127 GFP (vacuole), respectively. Co-localizations with positive signals for GFP and RFP  
1128 in the merged images are visualized in white. Scale bars: 10  $\mu$ m.
